# Supplementary material for: A peptide-based subunit candidate vaccine against SARS-CoV-2 delivered by biodegradable mesoporous silica nanoparticles induced high humoral and cellular immunity in mice
Source: Royal Society of Chemistry journal article supplement (doi:10.1039/d1bm01060c), 2021-01-01
Supplement: d1bm01060c1.pdf [file d1bm01060c1.pdf]

| Epitope # | Epitope name             | Epitope sequence | Epitope length | Percent of protein sequence matches at identity <= 100% | Minimum identity | Maximum identity | View details |
|-----------|--------------------------|------------------|----------------|---------------------------------------------------------|------------------|------------------|--------------|
| 42        | ws-<br>separate<br>d-41  | FPNITNLC<br>PF   | 10             | 100.00% (1/1)                                           | 100.00%          | 100.00%          |              |
| 47        | ws-<br>separate<br>d-46  | CVADYSVL<br>Y    | 9              | 100.00% (1/1)                                           | 100.00%          | 100.00%          |              |
| 80        | ws-<br>separate<br>d-79  | GYQPVRVV<br>VL   | 10             | 100.00% (1/1)                                           | 100.00%          | 100.00%          |              |
| 82        | ws-<br>separate<br>d-81  | QPYRVVVL<br>SF   | 10             | 100.00% (1/1)                                           | 100.00%          | 100.00%          |              |
| 83        | ws-<br>separate<br>d-82  | PYRVVLS<br>F     | 9              | 100.00% (1/1)                                           | 100.00%          | 100.00%          |              |
| 89        | ws-<br>separate<br>d-88  | VNFnFNGL         | 8              | 100.00% (1/1)                                           | 100.00%          | 100.00%          |              |
| 93        | ws-<br>separate<br>d-92  | VLYQDVNC<br>T    | 9              | 100.00% (1/1)                                           | 100.00%          | 100.00%          |              |
| 97        | ws-<br>separate<br>d-96  | IGAGICAS<br>Y    | 9              | 100.00% (1/1)                                           | 100.00%          | 100.00%          |              |
| 111       | ws-<br>separate<br>d-110 | LLLQYGSF<br>C    | 9              | 100.00% (1/1)                                           | 100.00%          | 100.00%          |              |
| 112       | ws-<br>separate<br>d-111 | LLQYGSFC<br>T    | 9              | 100.00% (1/1)                                           | 100.00%          | 100.00%          |              |
| 113       | ws-<br>separate<br>d-112 | GSFCTQLN<br>R    | 9              | 100.00% (1/1)                                           | 100.00%          | 100.00%          |              |
| 120       | ws-<br>separate<br>d-119 | SFIEDLLF<br>NK   | 10             | 100.00% (1/1)                                           | 100.00%          | 100.00%          |              |
| 121       | ws-<br>separate<br>d-120 | LLFNKVTL<br>A    | 9              | 100.00% (1/1)                                           | 100.00%          | 100.00%          |              |
| 129       | ws-<br>separate<br>d-128 | TQNVLYEN<br>QK   | 10             | 100.00% (1/1)                                           | 100.00%          | 100.00%          |              |
| 134       | ws-<br>separate<br>d-133 | AQALNTLV<br>K    | 9              | 100.00% (1/1)                                           | 100.00%          | 100.00%          |              |
| 135       | ws-<br>separate<br>d-134 | ALNTLVKQ<br>L    | 9              | 100.00% (1/1)                                           | 100.00%          | 100.00%          |              |

|     |                          |                |    |         |       |         |         |
|-----|--------------------------|----------------|----|---------|-------|---------|---------|
| 136 | ws-<br>separate<br>d-135 | SVLNDILS<br>R  | 9  | 100.00% | (1/1) | 100.00% | 100.00% |
| 137 | ws-<br>separate<br>d-136 | VLNDILSR<br>L  | 9  | 100.00% | (1/1) | 100.00% | 100.00% |
| 138 | ws-<br>separate<br>d-137 | RLDKVEAE<br>V  | 9  | 100.00% | (1/1) | 100.00% | 100.00% |
| 139 | ws-<br>separate<br>d-138 | AEVQIDRL<br>I  | 9  | 100.00% | (1/1) | 100.00% | 100.00% |
| 140 | ws-<br>separate<br>d-139 | AEVQIDRL<br>IT | 10 | 100.00% | (1/1) | 100.00% | 100.00% |
| 141 | ws-<br>separate<br>d-140 | VQIDRLIT<br>GR | 10 | 100.00% | (1/1) | 100.00% | 100.00% |
| 142 | ws-<br>separate<br>d-141 | LITGRLQS<br>L  | 9  | 100.00% | (1/1) | 100.00% | 100.00% |
| 143 | ws-<br>separate<br>d-142 | RLQSLQTY<br>V  | 9  | 100.00% | (1/1) | 100.00% | 100.00% |
| 144 | ws-<br>separate<br>d-143 | AEIRASAN<br>LA | 10 | 100.00% | (1/1) | 100.00% | 100.00% |
| 145 | ws-<br>separate<br>d-144 | ASANLAAT<br>K  | 9  | 100.00% | (1/1) | 100.00% | 100.00% |
| 146 | ws-<br>separate<br>d-145 | RVDFCGKG<br>Y  | 9  | 100.00% | (1/1) | 100.00% | 100.00% |
| 149 | ws-<br>separate<br>d-148 | APHGVVFL<br>HV | 10 | 100.00% | (1/1) | 100.00% | 100.00% |
| 150 | ws-<br>separate<br>d-149 | GVVFLHVT<br>Y  | 9  | 100.00% | (1/1) | 100.00% | 100.00% |
| 151 | ws-<br>separate<br>d-150 | VVFLHVTY<br>V  | 9  | 100.00% | (1/1) | 100.00% | 100.00% |
| 165 | ws-<br>separate<br>d-164 | IITDNTF<br>V   | 9  | 100.00% | (1/1) | 100.00% | 100.00% |
| 166 | ws-<br>separate<br>d-165 | VYDPLQPE<br>L  | 9  | 100.00% | (1/1) | 100.00% | 100.00% |
| 167 | ws-<br>separate<br>d-166 | DSFKEELD<br>KY | 10 | 100.00% | (1/1) | 100.00% | 100.00% |
| 168 | ws-<br>separate<br>d-167 | RLNEVAKN<br>L  | 9  | 100.00% | (1/1) | 100.00% | 100.00% |

|     |                          |                            |    |         |       |         |         |
|-----|--------------------------|----------------------------|----|---------|-------|---------|---------|
| 169 | ws-<br>separate<br>d-168 | NLNESLID<br>L              | 9  | 100.00% | (1/1) | 100.00% | 100.00% |
| 170 | ws-<br>separate<br>d-169 | SLIDLQEL<br>GK             | 10 | 100.00% | (1/1) | 100.00% | 100.00% |
| 171 | ws-<br>separate<br>d-170 | SLIDLQEL<br>GKYEQYIK<br>W  | 17 | 100.00% | (1/1) | 100.00% | 100.00% |
| 172 | ws-<br>separate<br>d-171 | LIDLQELG<br>KY             | 10 | 100.00% | (1/1) | 100.00% | 100.00% |
| 173 | ws-<br>separate<br>d-172 | QELGKYEQ<br>YI             | 10 | 100.00% | (1/1) | 100.00% | 100.00% |
| 175 | ws-<br>separate<br>d-174 | YEQYIKWP<br>WY             | 10 | 100.00% | (1/1) | 100.00% | 100.00% |
| 179 | ws-<br>separate<br>d-178 | FIAGLIAI<br>V              | 9  | 100.00% | (1/1) | 100.00% | 100.00% |
| 180 | ws-<br>separate<br>d-179 | GLIAIVMV<br>TI             | 10 | 100.00% | (1/1) | 100.00% | 100.00% |
| 183 | ws-<br>separate<br>d-182 | CMTSCCSC<br>LK             | 10 | 100.00% | (1/1) | 100.00% | 100.00% |
| 184 | ws-<br>separate<br>d-183 | MTSCCSC<br>K               | 9  | 100.00% | (1/1) | 100.00% | 100.00% |
| 185 | ws-<br>separate<br>d-184 | DEDDSEPV<br>L              | 9  | 100.00% | (1/1) | 100.00% | 100.00% |
| 186 | ws-<br>separate<br>d-185 | SEPVLKGV<br>KL             | 10 | 100.00% | (1/1) | 100.00% | 100.00% |
| 84  | ws-<br>separate<br>d-83  | VVLSFELL<br>NAPATVCG<br>PK | 18 | 100.00% | (1/1) | 94.44%  | 94.44%  |
| 174 | ws-<br>separate<br>d-173 | LGKYEQYI<br>KWPWYVWL<br>GF | 18 | 100.00% | (1/1) | 94.44%  | 94.44%  |
| 81  | ws-<br>separate<br>d-80  | GYQPVRVV<br>VLSFELLN<br>A  | 17 | 100.00% | (1/1) | 94.12%  | 94.12%  |
| 147 | ws-<br>separate<br>d-146 | LMSFPQAA<br>PHGVVFLH<br>V  | 17 | 100.00% | (1/1) | 94.12%  | 94.12%  |
| 24  | ws-<br>separate<br>d-23  | NFKHLREF<br>VF             | 10 | 100.00% | (1/1) | 90.00%  | 90.00%  |
| 25  | ws-<br>separate<br>d-24  | REFVFKNK<br>DG             | 10 | 100.00% | (1/1) | 90.00%  | 90.00%  |

|     |                          |                |    |         |       |        |        |
|-----|--------------------------|----------------|----|---------|-------|--------|--------|
| 48  | ws-<br>separate<br>d-47  | ADYSVLYN<br>ST | 10 | 100.00% | (1/1) | 90.00% | 90.00% |
| 52  | ws-<br>separate<br>d-51  | KCYGVSAT<br>KL | 10 | 100.00% | (1/1) | 90.00% | 90.00% |
| 54  | ws-<br>separate<br>d-53  | KLNDLCFS<br>NV | 10 | 100.00% | (1/1) | 90.00% | 90.00% |
| 59  | ws-<br>separate<br>d-58  | KLPDDFMG<br>CV | 10 | 100.00% | (1/1) | 90.00% | 90.00% |
| 86  | ws-<br>separate<br>d-85  | APATVCGP<br>KL | 10 | 100.00% | (1/1) | 90.00% | 90.00% |
| 115 | ws-<br>separate<br>d-114 | VFAQVKQM<br>YK | 10 | 100.00% | (1/1) | 90.00% | 90.00% |
| 122 | ws-<br>separate<br>d-121 | VTLADAGF<br>MK | 10 | 100.00% | (1/1) | 90.00% | 90.00% |
| 148 | ws-<br>separate<br>d-147 | FPQAAPHG<br>VV | 10 | 100.00% | (1/1) | 90.00% | 90.00% |
| 154 | ws-<br>separate<br>d-153 | APAICHEG<br>KA | 10 | 100.00% | (1/1) | 90.00% | 90.00% |
| 159 | ws-<br>separate<br>d-158 | REGVFVFN<br>GT | 10 | 100.00% | (1/1) | 90.00% | 90.00% |
| 176 | ws-<br>separate<br>d-175 | QYIKWPWY<br>VW | 10 | 100.00% | (1/1) | 90.00% | 90.00% |
| 177 | ws-<br>separate<br>d-176 | WPWYVWLG<br>FI | 10 | 100.00% | (1/1) | 90.00% | 90.00% |
| 181 | ws-<br>separate<br>d-180 | VMVTILLC<br>CM | 10 | 100.00% | (1/1) | 90.00% | 90.00% |
| 9   | ws-<br>separate<br>d-8   | TQDLFLPF<br>Y  | 9  | 100.00% | (1/1) | 88.89% | 88.89% |
| 46  | ws-<br>separate<br>d-45  | KISNCVAD<br>Y  | 9  | 100.00% | (1/1) | 88.89% | 88.89% |
| 53  | ws-<br>separate<br>d-52  | CYGVSATK<br>L  | 9  | 100.00% | (1/1) | 88.89% | 88.89% |
| 56  | ws-<br>separate<br>d-55  | GVIADYNY<br>K  | 9  | 100.00% | (1/1) | 88.89% | 88.89% |
| 57  | ws-<br>separate<br>d-56  | VIADYNYK<br>L  | 9  | 100.00% | (1/1) | 88.89% | 88.89% |

|     |                          |                            |    |         |       |        |        |
|-----|--------------------------|----------------------------|----|---------|-------|--------|--------|
| 58  | ws-<br>separate<br>d-57  | KLPDDFMG<br>C              | 9  | 100.00% | (1/1) | 88.89% | 88.89% |
| 85  | ws-<br>separate<br>d-84  | FELLNAPA<br>T              | 9  | 100.00% | (1/1) | 88.89% | 88.89% |
| 88  | ws-<br>separate<br>d-87  | IKNQCVNF<br>NFNGLTGT<br>GV | 18 | 100.00% | (1/1) | 88.89% | 88.89% |
| 96  | ws-<br>separate<br>d-95  | HVDTSYEC<br>DIPIGAGI<br>CA | 18 | 100.00% | (1/1) | 88.89% | 88.89% |
| 103 | ws-<br>separate<br>d-102 | SIVAYTMS<br>L              | 9  | 100.00% | (1/1) | 88.89% | 88.89% |
| 105 | ws-<br>separate<br>d-104 | AYSNNTIA<br>I              | 9  | 100.00% | (1/1) | 88.89% | 88.89% |
| 109 | ws-<br>separate<br>d-108 | KTSVDCNM<br>Y              | 9  | 100.00% | (1/1) | 88.89% | 88.89% |
| 110 | ws-<br>separate<br>d-109 | ECANLLQ<br>Y               | 9  | 100.00% | (1/1) | 88.89% | 88.89% |
| 114 | ws-<br>separate<br>d-113 | VFAQVKQM<br>Y              | 9  | 100.00% | (1/1) | 88.89% | 88.89% |
| 118 | ws-<br>separate<br>d-117 | SQILPDPL<br>K              | 9  | 100.00% | (1/1) | 88.89% | 88.89% |
| 123 | ws-<br>separate<br>d-122 | TLADAGFM<br>K              | 9  | 100.00% | (1/1) | 88.89% | 88.89% |
| 130 | ws-<br>separate<br>d-129 | VLYENQKQ<br>I              | 9  | 100.00% | (1/1) | 88.89% | 88.89% |
| 155 | ws-<br>separate<br>d-154 | AYFPREGV<br>F              | 9  | 100.00% | (1/1) | 88.89% | 88.89% |
| 157 | ws-<br>separate<br>d-156 | FPREGVFN<br>F              | 9  | 100.00% | (1/1) | 88.89% | 88.89% |
| 158 | ws-<br>separate<br>d-157 | REGVFN<br>G                | 9  | 100.00% | (1/1) | 88.89% | 88.89% |
| 178 | ws-<br>separate<br>d-177 | VWLGFIAG<br>L              | 9  | 100.00% | (1/1) | 88.89% | 88.89% |
| 182 | ws-<br>separate<br>d-181 | ILLCCMTS<br>C              | 9  | 100.00% | (1/1) | 88.89% | 88.89% |
| 6   | ws-<br>separate<br>d-5   | GVYYPDEI<br>FR             | 10 | 100.00% | (1/1) | 80.00% | 80.00% |

|     |                          |                            |    |         |       |        |        |
|-----|--------------------------|----------------------------|----|---------|-------|--------|--------|
| 8   | ws-<br>separate<br>d-7   | LTQDLFLP<br>FY             | 10 | 100.00% | (1/1) | 80.00% | 80.00% |
| 10  | ws-<br>separate<br>d-9   | LPFYSNVT<br>GF             | 10 | 100.00% | (1/1) | 80.00% | 80.00% |
| 32  | ws-<br>separate<br>d-31  | AAAYFVGY<br>LK             | 10 | 100.00% | (1/1) | 80.00% | 80.00% |
| 43  | ws-<br>separate<br>d-42  | FNATKFPS<br>VY             | 10 | 100.00% | (1/1) | 80.00% | 80.00% |
| 49  | ws-<br>separate<br>d-48  | DYSVLYNS<br>TF             | 10 | 100.00% | (1/1) | 80.00% | 80.00% |
| 50  | ws-<br>separate<br>d-49  | LYNSTFFS<br>TF             | 10 | 100.00% | (1/1) | 80.00% | 80.00% |
| 55  | ws-<br>separate<br>d-54  | NVYADSFV<br>VK             | 10 | 100.00% | (1/1) | 80.00% | 80.00% |
| 60  | ws-<br>separate<br>d-59  | LPDDFMGC<br>VL             | 10 | 100.00% | (1/1) | 80.00% | 80.00% |
| 79  | ws-<br>separate<br>d-78  | TTGIGYQP<br>YR             | 10 | 100.00% | (1/1) | 80.00% | 80.00% |
| 90  | ws-<br>separate<br>d-89  | RFQPFQQF<br>GR             | 10 | 100.00% | (1/1) | 80.00% | 80.00% |
| 92  | ws-<br>separate<br>d-91  | SEVAVLYQ<br>DV             | 10 | 100.00% | (1/1) | 80.00% | 80.00% |
| 153 | ws-<br>separate<br>d-152 | TYVPSQER<br>NF             | 10 | 100.00% | (1/1) | 80.00% | 80.00% |
| 156 | ws-<br>separate<br>d-155 | YFPREGVF<br>VF             | 10 | 100.00% | (1/1) | 80.00% | 80.00% |
| 7   | ws-<br>separate<br>d-6   | YLTQDLFL<br>PFYSNVTG<br>FH | 18 | 100.00% | (1/1) | 77.78% | 77.78% |
| 20  | ws-<br>separate<br>d-19  | NAFNCTFE<br>Y              | 9  | 100.00% | (1/1) | 77.78% | 77.78% |
| 21  | ws-<br>separate<br>d-20  | AFNCTFEY<br>I              | 9  | 100.00% | (1/1) | 77.78% | 77.78% |
| 31  | ws-<br>separate<br>d-30  | SAAAYFVG<br>Y              | 9  | 100.00% | (1/1) | 77.78% | 77.78% |
| 33  | ws-<br>separate<br>d-32  | AAAYFVGY<br>LKPTTFML<br>KY | 18 | 100.00% | (1/1) | 77.78% | 77.78% |

|     |                          |                            |    |         |       |        |        |
|-----|--------------------------|----------------------------|----|---------|-------|--------|--------|
| 34  | ws-<br>separate<br>d-33  | AA YFVGYL<br>K             | 9  | 100.00% | (1/1) | 77.78% | 77.78% |
| 44  | ws-<br>separate<br>d-43  | SVYAWERK<br>K              | 9  | 100.00% | (1/1) | 77.78% | 77.78% |
| 45  | ws-<br>separate<br>d-44  | VYAWERKK<br>I              | 9  | 100.00% | (1/1) | 77.78% | 77.78% |
| 51  | ws-<br>separate<br>d-50  | TFFSTFKC<br>Y              | 9  | 100.00% | (1/1) | 77.78% | 77.78% |
| 78  | ws-<br>separate<br>d-77  | TTGIGYQP<br>Y              | 9  | 100.00% | (1/1) | 77.78% | 77.78% |
| 87  | ws-<br>separate<br>d-86  | GPKLSTDL<br>IKNQCVNF<br>NF | 18 | 100.00% | (1/1) | 77.78% | 77.78% |
| 94  | ws-<br>separate<br>d-93  | IYSTGNNV<br>F              | 9  | 100.00% | (1/1) | 77.78% | 77.78% |
| 95  | ws-<br>separate<br>d-94  | GAEHVDTS<br>Y              | 9  | 100.00% | (1/1) | 77.78% | 77.78% |
| 106 | ws-<br>separate<br>d-105 | IPTNFSIS<br>I              | 9  | 100.00% | (1/1) | 77.78% | 77.78% |
| 119 | ws-<br>separate<br>d-118 | ILPDPLKP<br>T              | 9  | 100.00% | (1/1) | 77.78% | 77.78% |
| 124 | ws-<br>separate<br>d-123 | LLTDDMIA<br>A              | 9  | 100.00% | (1/1) | 77.78% | 77.78% |
| 125 | ws-<br>separate<br>d-124 | LTDDMIAA<br>Y              | 9  | 100.00% | (1/1) | 77.78% | 77.78% |
| 126 | ws-<br>separate<br>d-125 | MIAAYTAA<br>L              | 9  | 100.00% | (1/1) | 77.78% | 77.78% |
| 128 | ws-<br>separate<br>d-127 | ATAGWTFG<br>A              | 9  | 100.00% | (1/1) | 77.78% | 77.78% |
| 131 | ws-<br>separate<br>d-130 | KQIANQFN<br>K              | 9  | 100.00% | (1/1) | 77.78% | 77.78% |
| 152 | ws-<br>separate<br>d-151 | VTYVPSQE<br>R              | 9  | 100.00% | (1/1) | 77.78% | 77.78% |
| 161 | ws-<br>separate<br>d-160 | GTSWFITQ<br>R              | 9  | 100.00% | (1/1) | 77.78% | 77.78% |
| 162 | ws-<br>separate<br>d-161 | SWFITQRN<br>F              | 9  | 100.00% | (1/1) | 77.78% | 77.78% |

|     |                          |                 |    |         |       |        |        |
|-----|--------------------------|-----------------|----|---------|-------|--------|--------|
| 164 | ws-<br>separate<br>d-163 | WFITQRNF<br>F   | 9  | 100.00% | (1/1) | 77.78% | 77.78% |
| 19  | ws-<br>separate<br>d-18  | DNAFNCTF<br>EY  | 10 | 100.00% | (1/1) | 70.00% | 70.00% |
| 36  | ws-<br>separate<br>d-35  | GYLKPTTF<br>ML  | 10 | 100.00% | (1/1) | 70.00% | 70.00% |
| 40  | ws-<br>separate<br>d-39  | KSF EIDKG<br>IY | 10 | 100.00% | (1/1) | 70.00% | 70.00% |
| 41  | ws-<br>separate<br>d-40  | FEIDKGIY<br>QT  | 10 | 100.00% | (1/1) | 70.00% | 70.00% |
| 68  | ws-<br>separate<br>d-67  | STGNVNYK<br>YR  | 10 | 100.00% | (1/1) | 70.00% | 70.00% |
| 70  | ws-<br>separate<br>d-69  | NVNYKYRY<br>LR  | 10 | 100.00% | (1/1) | 70.00% | 70.00% |
| 75  | ws-<br>separate<br>d-74  | CYWPLNDY<br>GF  | 10 | 100.00% | (1/1) | 70.00% | 70.00% |
| 77  | ws-<br>separate<br>d-76  | TTTGIGYQ<br>PY  | 10 | 100.00% | (1/1) | 70.00% | 70.00% |
| 116 | ws-<br>separate<br>d-115 | KQMYKTPT<br>LK  | 10 | 100.00% | (1/1) | 70.00% | 70.00% |
| 160 | ws-<br>separate<br>d-159 | FVFNGTSW<br>FI  | 10 | 100.00% | (1/1) | 70.00% | 70.00% |
| 163 | ws-<br>separate<br>d-162 | SWFITQRN<br>FF  | 10 | 100.00% | (1/1) | 70.00% | 70.00% |
| 5   | ws-<br>separate<br>d-4   | TSSMRGVY<br>Y   | 9  | 100.00% | (1/1) | 66.67% | 66.67% |
| 35  | ws-<br>separate<br>d-34  | GYLKPTTF<br>M   | 9  | 100.00% | (1/1) | 66.67% | 66.67% |
| 37  | ws-<br>separate<br>d-36  | KPTTFMLK<br>Y   | 9  | 100.00% | (1/1) | 66.67% | 66.67% |
| 67  | ws-<br>separate<br>d-66  | STGNVNYK<br>Y   | 9  | 100.00% | (1/1) | 66.67% | 66.67% |
| 69  | ws-<br>separate<br>d-68  | NVNYKYRY<br>L   | 9  | 100.00% | (1/1) | 66.67% | 66.67% |
| 91  | ws-<br>separate<br>d-90  | ASSEVAVL<br>Y   | 9  | 100.00% | (1/1) | 66.67% | 66.67% |



|     |                          |                           |    |         |       |        |        |
|-----|--------------------------|---------------------------|----|---------|-------|--------|--------|
| 104 | ws-<br>separate<br>d-103 | LGADSSIA<br>Y             | 9  | 100.00% | (1/1) | 66.67% | 66.67% |
| 107 | ws-<br>separate<br>d-106 | TEVMPVSM<br>A             | 9  | 100.00% | (1/1) | 66.67% | 66.67% |
| 108 | ws-<br>separate<br>d-107 | EVMPVSMA<br>K             | 9  | 100.00% | (1/1) | 66.67% | 66.67% |
| 12  | ws-<br>separate<br>d-11  | TFGNPVIP<br>FKDGIYFA<br>A | 17 | 100.00% | (1/1) | 64.71% | 64.71% |
| 71  | ws-<br>separate<br>d-70  | YNYKYRYL                  | 8  | 100.00% | (1/1) | 62.50% | 62.50% |
| 4   | ws-<br>separate<br>d-3   | HTSSMRGV<br>YY            | 10 | 100.00% | (1/1) | 60.00% | 60.00% |
| 11  | ws-<br>separate<br>d-10  | TFGNPVIP<br>FK            | 10 | 100.00% | (1/1) | 60.00% | 60.00% |
| 27  | ws-<br>separate<br>d-26  | DLPSGFNT<br>LK            | 10 | 100.00% | (1/1) | 60.00% | 60.00% |
| 29  | ws-<br>separate<br>d-28  | IWGTSAAA<br>YFVGYLK       | 15 | 100.00% | (1/1) | 60.00% | 60.00% |
| 66  | ws-<br>separate<br>d-65  | TSTGNVNY<br>KY            | 10 | 100.00% | (1/1) | 60.00% | 60.00% |
| 72  | ws-<br>separate<br>d-71  | FERDISNV<br>PF            | 10 | 100.00% | (1/1) | 60.00% | 60.00% |
| 117 | ws-<br>separate<br>d-116 | QMYKTPTL<br>KY            | 10 | 100.00% | (1/1) | 60.00% | 60.00% |
| 100 | ws-<br>separate<br>d-99  | LLRSTSQK<br>SIVAYTMS<br>L | 17 | 100.00% | (1/1) | 58.82% | 58.82% |
| 1   | ws-<br>separate<br>d-0   | FIFLLFLT<br>L             | 9  | 100.00% | (1/1) | 55.56% | 55.56% |
| 3   | ws-<br>separate<br>d-2   | HTSSMRGV<br>Y             | 9  | 100.00% | (1/1) | 55.56% | 55.56% |
| 26  | ws-<br>separate<br>d-25  | NKDGFLYV<br>Y             | 9  | 100.00% | (1/1) | 55.56% | 55.56% |
| 30  | ws-<br>separate<br>d-29  | GTSAAAYF<br>V             | 9  | 100.00% | (1/1) | 55.56% | 55.56% |
| 63  | ws-<br>separate<br>d-62  | ATSTGNVY<br>Y             | 9  | 100.00% | (1/1) | 55.56% | 55.56% |

|     |                          |                |    |               |        |        |
|-----|--------------------------|----------------|----|---------------|--------|--------|
| 65  | ws-<br>separate<br>d-64  | TSTGNYN<br>K   | 9  | 100.00% (1/1) | 55.56% | 55.56% |
| 76  | ws-<br>separate<br>d-75  | FYTTTGIG<br>Y  | 9  | 100.00% (1/1) | 55.56% | 55.56% |
| 127 | ws-<br>separate<br>d-126 | ALVSGTAT<br>A  | 9  | 100.00% (1/1) | 55.56% | 55.56% |
| 133 | ws-<br>separate<br>d-132 | TTTSTALG<br>K  | 9  | 100.00% (1/1) | 55.56% | 55.56% |
| 13  | ws-<br>separate<br>d-12  | WVFGSTMN<br>NK | 10 | 100.00% (1/1) | 50.00% | 50.00% |
| 22  | ws-<br>separate<br>d-21  | FEYISDAF<br>SL | 10 | 100.00% (1/1) | 50.00% | 50.00% |
| 61  | ws-<br>separate<br>d-60  | NIDATSTG<br>NY | 10 | 100.00% (1/1) | 50.00% | 50.00% |
| 64  | ws-<br>separate<br>d-63  | ATSTGNYN<br>YK | 10 | 100.00% (1/1) | 50.00% | 50.00% |
| 74  | ws-<br>separate<br>d-73  | PPALNCYW<br>PL | 10 | 100.00% (1/1) | 50.00% | 50.00% |
| 101 | ws-<br>separate<br>d-100 | STSQKSIV<br>AY | 10 | 100.00% (1/1) | 50.00% | 50.00% |
| 132 | ws-<br>separate<br>d-131 | QESLTTTS<br>TA | 10 | 100.00% (1/1) | 50.00% | 50.00% |
| 2   | ws-<br>separate<br>d-1   | FDDVQAPN<br>Y  | 9  | 100.00% (1/1) | 44.44% | 44.44% |
| 14  | ws-<br>separate<br>d-13  | VFGSTMNN<br>K  | 9  | 100.00% (1/1) | 44.44% | 44.44% |
| 15  | ws-<br>separate<br>d-14  | TMNNKSQS<br>V  | 9  | 100.00% (1/1) | 44.44% | 44.44% |
| 16  | ws-<br>separate<br>d-15  | FELCDNPF<br>F  | 9  | 100.00% (1/1) | 44.44% | 44.44% |
| 17  | ws-<br>separate<br>d-16  | ELCDNPF<br>A   | 9  | 100.00% (1/1) | 44.44% | 44.44% |
| 18  | ws-<br>separate<br>d-17  | MIFDNAFN<br>C  | 9  | 100.00% (1/1) | 44.44% | 44.44% |
| 23  | ws-<br>separate<br>d-22  | AFSLDVSE<br>K  | 9  | 100.00% (1/1) | 44.44% | 44.44% |

|     |                          |                |    |               |        |        |
|-----|--------------------------|----------------|----|---------------|--------|--------|
| 38  | ws-<br>separate<br>d-37  | SQNPLAEL<br>K  | 9  | 100.00% (1/1) | 44.44% | 44.44% |
| 39  | ws-<br>separate<br>d-38  | SVKSFEID<br>K  | 9  | 100.00% (1/1) | 44.44% | 44.44% |
| 62  | ws-<br>separate<br>d-61  | IDATSTGN<br>Y  | 9  | 100.00% (1/1) | 44.44% | 44.44% |
| 73  | ws-<br>separate<br>d-72  | CTPPALNC<br>Y  | 9  | 100.00% (1/1) | 44.44% | 44.44% |
| 99  | ws-<br>separate<br>d-98  | SLLRSTSQ<br>K  | 9  | 100.00% (1/1) | 44.44% | 44.44% |
| 102 | ws-<br>separate<br>d-101 | TSQKSIVA<br>Y  | 9  | 100.00% (1/1) | 44.44% | 44.44% |
| 28  | ws-<br>separate<br>d-27  | GFNTLKPI<br>FK | 10 | 100.00% (1/1) | 40.00% | 40.00% |
| 98  | ws-<br>separate<br>d-97  | VSLLRSTS<br>QK | 10 | 100.00% (1/1) | 40.00% | 40.00% |
