# Supplementary material for: A peptide-based subunit candidate vaccine against SARS-CoV-2 delivered by biodegradable mesoporous silica nanoparticles induced high humoral and cellular immunity in mice
Source: Royal Society of Chemistry journal article supplement (doi:10.1039/d1bm01060c), 2021-01-01
Supplement: d1bm01060c2.pdf [file d1bm01060c2.pdf]

**Center position: 4    Threshold: 0.50**  
**Average: 0.470    Minimum: 0.183    Maximum: 0.695**

**Predicted peptides:**

| No. | Start | End | Peptide                                                     | Length |
|-----|-------|-----|-------------------------------------------------------------|--------|
| 1   | 13    | 37  | SQCVNLTTRTQLPPAYTNSFTRGVY                                   | 25     |
| 2   | 59    | 81  | FSNVTWFHAIHVSGTNGTKRFDN                                     | 23     |
| 3   | 97    | 98  | KS                                                          | 2      |
| 4   | 138   | 154 | DPFLGVYYHKNNKSWME                                           | 17     |
| 5   | 177   | 189 | MDLEGKQGDFKLN                                               | 13     |
| 6   | 206   | 221 | KHTPINLVRDLPGQFS                                            | 16     |
| 7   | 250   | 260 | TPGDSSSGWTA                                                 | 11     |
| 8   | 293   | 296 | LDPL                                                        | 4      |
| 9   | 304   | 322 | KSFTVEKGIYQTSNFRVQP                                         | 19     |
| 10  | 329   | 363 | FPNITNLCPFGEVFNATRFASVYAWNRKRISNCVA                         | 35     |
| 11  | 369   | 393 | YNSASFSTFKCYGVSPTKLNDLCFT                                   | 25     |
| 12  | 404   | 426 | GDEVRQIAPGQTGKIADYNYKLP                                     | 23     |
| 13  | 440   | 501 | NLDSKVGGNLYRFLFRKSNLKPFERDISTEIQAGSTPCNGVEGFNCYFPLQSYGFQPTN | 62     |
| 14  | 516   | 536 | ELLHAPATVCGPKKSTNLVKN                                       | 21     |
| 15  | 555   | 562 | SNKKFLPF                                                    | 8      |
| 16  | 580   | 583 | QTLE                                                        | 4      |
| 17  | 602   | 606 | TNTSN                                                       | 5      |
| 18  | 616   | 632 | NCTEVPVAIHADQLTPT                                           | 17     |
| 19  | 634   | 644 | RVYSTGSNVFQ                                                 | 11     |
| 20  | 656   | 666 | VNNSYECDIPI                                                 | 11     |
| 21  | 672   | 690 | ASYQTQTNSPRRARSVASQ                                         | 19     |
| 22  | 695   | 710 | YTMSLGAENSVAYSNN                                            | 16     |
| 23  | 748   | 748 | E                                                           | 1      |
| 24  | 773   | 779 | EQDKNTQ                                                     | 7      |
| 25  | 786   | 800 | KQIYKTPPIKDFGGF                                             | 15     |

| No. | Start | End  | Peptide                                  | Length |
|-----|-------|------|------------------------------------------|--------|
| 26  | 807   | 814  | PDPSKPSK                                 | 8      |
| 27  | 828   | 842  | LADAGFIKQYGDCLG                          | 15     |
| 28  | 988   | 992  | EAEVQ                                    | 5      |
| 29  | 1035  | 1043 | GQSKRVDFC                                | 9      |
| 30  | 1107  | 1118 | RNFYEPQIITTD                             | 12     |
| 31  | 1133  | 1172 | VNNTVYDPLQPELDSFKEELDKYFKNHTSPDVDLGDISGI | 40     |
| 32  | 1203  | 1206 | LGKY                                     | 4      |
| 33  | 1252  | 1267 | SCCKFDEDDSEPVLKG                         | 16     |
| 34  | 1269  | 1269 | K                                        | 1      |
