# Supplementary material for: A peptide-based subunit candidate vaccine against SARS-CoV-2 delivered by biodegradable mesoporous silica nanoparticles induced high humoral and cellular immunity in mice
Source: Royal Society of Chemistry journal article supplement (doi:10.1039/d1bm01060c), 2021-01-01
Supplement: d1bm01060c3.pdf [file d1bm01060c3.pdf]

MHC-I Binding Prediction Results

-----  
Method used: netmhcpa\_el

| allele      | seq_num | start | end  | length | peptide    | score    | percentile_rank |
|-------------|---------|-------|------|--------|------------|----------|-----------------|
| HLA-A*01:01 | 1       | 865   | 873  | 9      | LTDEMIAQY  | 0.997196 | 0.01            |
| HLA-B*35:01 | 1       | 896   | 904  | 9      | IPFAMQMAY  | 0.994479 | 0.01            |
| HLA-B*58:01 | 1       | 625   | 633  | 9      | HADQLTPTW  | 0.990462 | 0.01            |
| HLA-B*35:01 | 1       | 84    | 92   | 9      | LPFNDGVYF  | 0.984594 | 0.01            |
| HLA-B*44:03 | 1       | 1201  | 1209 | 9      | QELGKYEQY  | 0.984568 | 0.01            |
| HLA-B*53:01 | 1       | 56    | 64   | 9      | LPFFSNVTW  | 0.98139  | 0.01            |
| HLA-B*35:01 | 1       | 687   | 695  | 9      | VASQSIIAY  | 0.979222 | 0.01            |
| HLA-A*03:01 | 1       | 454   | 462  | 9      | RLFRKSNLK  | 0.978678 | 0.01            |
| HLA-B*40:01 | 1       | 1016  | 1024 | 9      | AEIRASANL  | 0.976223 | 0.01            |
| HLA-A*68:02 | 1       | 777   | 785  | 9      | NTQEVFAQV  | 0.975719 | 0.01            |
| HLA-A*02:03 | 1       | 976   | 984  | 9      | VLNDILSRL  | 0.973205 | 0.01            |
| HLA-A*02:01 | 1       | 269   | 277  | 9      | YLPRTFLL   | 0.971198 | 0.02            |
| HLA-B*57:01 | 1       | 625   | 633  | 9      | HADQLTPTW  | 0.970982 | 0.04            |
| HLA-B*44:02 | 1       | 1201  | 1209 | 9      | QELGKYEQY  | 0.969971 | 0.01            |
| HLA-B*53:01 | 1       | 625   | 633  | 9      | HADQLTPTW  | 0.966089 | 0.01            |
| HLA-A*01:01 | 1       | 864   | 873  | 10     | LLTDEMIAQY | 0.961805 | 0.01            |
| HLA-B*44:02 | 1       | 95    | 104  | 10     | TEKSNIIRGW | 0.95443  | 0.01            |
| HLA-B*57:01 | 1       | 344   | 353  | 10     | ATRFASVYAW | 0.954826 | 0.06            |
| HLA-A*24:02 | 1       | 1208  | 1216 | 9      | QYIKWPWYI  | 0.951647 | 0.01            |
| HLA-B*44:03 | 1       | 95    | 104  | 10     | TEKSNIIRGW | 0.948122 | 0.02            |
| HLA-B*53:01 | 1       | 84    | 92   | 9      | LPFNDGVYF  | 0.947976 | 0.01            |
| HLA-A*03:01 | 1       | 787   | 795  | 9      | QIYKTPPIK  | 0.947791 | 0.02            |
| HLA-B*35:01 | 1       | 321   | 329  | 9      | QPTESIVRF  | 0.947034 | 0.02            |
| HLA-A*68:01 | 1       | 725   | 733  | 9      | EILPVSMTK  | 0.945141 | 0.04            |
| HLA-A*11:01 | 1       | 1065  | 1073 | 9      | VTYVPAQEK  | 0.944416 | 0.01            |
| HLA-B*15:01 | 1       | 1264  | 1272 | 9      | VLKGVKLHY  | 0.943479 | 0.01            |
| HLA-B*51:01 | 1       | 714   | 722  | 9      | IPTNFTISV  | 0.942802 | 0.01            |
| HLA-A*23:01 | 1       | 1208  | 1216 | 9      | QYIKWPWYI  | 0.942756 | 0.01            |
| HLA-A*68:01 | 1       | 394   | 403  | 10     | NVYADSFVIR | 0.939877 | 0.04            |
| HLA-A*02:01 | 1       | 976   | 984  | 9      | VLNDILSRL  | 0.938498 | 0.03            |
| HLA-A*24:02 | 1       | 1066  | 1075 | 10     | TYVPAQEKNF | 0.936206 | 0.02            |
| HLA-A*31:01 | 1       | 458   | 466  | 9      | KSNLKPFER  | 0.935717 | 0.01            |
| HLA-B*58:01 | 1       | 815   | 823  | 9      | RSFIEDLLF  | 0.933645 | 0.04            |
| HLA-A*03:01 | 1       | 1065  | 1073 | 9      | VTYVPAQEK  | 0.932408 | 0.02            |
| HLA-B*57:01 | 1       | 815   | 823  | 9      | RSFIEDLLF  | 0.931244 | 0.08            |
| HLA-B*53:01 | 1       | 321   | 329  | 9      | QPTESIVRF  | 0.930256 | 0.02            |
| HLA-A*31:01 | 1       | 1099  | 1107 | 9      | GTHWFVTQR  | 0.927106 | 0.01            |
| HLA-A*03:01 | 1       | 302   | 310  | 9      | TLKSFTVEK  | 0.926974 | 0.02            |
| HLA-A*24:02 | 1       | 635   | 643  | 9      | VYSTGSNVF  | 0.925478 | 0.02            |
| HLA-A*68:02 | 1       | 718   | 726  | 9      | FTISVTTEI  | 0.923585 | 0.02            |

|             |   |      |      |    |            |          |      |
|-------------|---|------|------|----|------------|----------|------|
| HLA-B*40:01 | 1 | 168  | 176  | 9  | FEYVSPFL   | 0.922159 | 0.06 |
| HLA-A*11:01 | 1 | 89   | 97   | 9  | GVYFASTEK  | 0.920846 | 0.01 |
| HLA-A*31:01 | 1 | 349  | 357  | 9  | SVYAWNRKR  | 0.919617 | 0.02 |
| HLA-B*07:02 | 1 | 680  | 688  | 9  | SPRRARVA   | 0.918799 | 0.04 |
| HLA-A*03:01 | 1 | 89   | 97   | 9  | GVYFASTEK  | 0.918399 | 0.02 |
| HLA-A*01:01 | 1 | 604  | 612  | 9  | TSNQVAVLY  | 0.917927 | 0.03 |
| HLA-A*03:01 | 1 | 786  | 795  | 10 | KQIYKTPPIK | 0.916015 | 0.03 |
| HLA-A*02:01 | 1 | 109  | 117  | 9  | TLDSKTQSL  | 0.914998 | 0.03 |
| HLA-A*23:01 | 1 | 1066 | 1075 | 10 | TYVPAQEKNF | 0.913776 | 0.02 |
| HLA-B*53:01 | 1 | 55   | 64   | 10 | FLPFFSNVTW | 0.912066 | 0.02 |
| HLA-B*57:01 | 1 | 878  | 886  | 9  | LAGTITSGW  | 0.908875 | 0.1  |
| HLA-A*03:01 | 1 | 408  | 417  | 10 | RQIAPGQTGK | 0.904489 | 0.03 |
| HLA-B*58:01 | 1 | 878  | 886  | 9  | LAGTITSGW  | 0.903533 | 0.06 |
| HLA-A*11:01 | 1 | 1020 | 1028 | 9  | ASANLAATK  | 0.900268 | 0.02 |
| HLA-A*03:01 | 1 | 142  | 150  | 9  | GVYYHKNNK  | 0.897956 | 0.03 |
| HLA-B*44:03 | 1 | 989  | 997  | 9  | AEVQIDRLI  | 0.89662  | 0.04 |
| HLA-A*68:01 | 1 | 637  | 646  | 10 | STGSNVFQTR | 0.89597  | 0.07 |
| HLA-A*26:01 | 1 | 780  | 789  | 10 | EVFAQVKQIY | 0.895499 | 0.02 |
| HLA-A*24:02 | 1 | 159  | 168  | 10 | VYSSANNCTF | 0.895435 | 0.03 |
| HLA-B*08:01 | 1 | 269  | 277  | 9  | YLQPRTFLL  | 0.894495 | 0.02 |
| HLA-A*31:01 | 1 | 36   | 44   | 9  | VYYDPKVFR  | 0.892155 | 0.03 |
| HLA-A*68:01 | 1 | 1099 | 1107 | 9  | GTHWFVTQR  | 0.890855 | 0.08 |
| HLA-A*24:02 | 1 | 368  | 377  | 10 | LYNSASFSTF | 0.890372 | 0.03 |
| HLA-A*02:03 | 1 | 821  | 829  | 9  | LLFNKVTLA  | 0.890132 | 0.03 |
| HLA-A*02:06 | 1 | 269  | 277  | 9  | YLQPRTFLL  | 0.889523 | 0.04 |
| HLA-A*68:02 | 1 | 1168 | 1176 | 9  | DISGINASV  | 0.887294 | 0.02 |
| HLA-A*68:01 | 1 | 370  | 378  | 9  | NSASFSTFK  | 0.886711 | 0.09 |
| HLA-A*02:03 | 1 | 269  | 277  | 9  | YLQPRTFLL  | 0.886651 | 0.03 |
| HLA-B*58:01 | 1 | 624  | 633  | 10 | IHADQLTPTW | 0.886293 | 0.07 |
| HLA-A*24:02 | 1 | 788  | 797  | 10 | IYKTPPIKDF | 0.885207 | 0.03 |
| HLA-A*24:02 | 1 | 448  | 456  | 9  | NYNLYRLF   | 0.883164 | 0.04 |
| HLA-B*51:01 | 1 | 712  | 720  | 9  | IAIPTNFTI  | 0.879596 | 0.02 |
| HLA-A*31:01 | 1 | 677  | 685  | 9  | QTNSPRRAR  | 0.878824 | 0.04 |
| HLA-A*02:06 | 1 | 417  | 425  | 9  | KIADYNYKL  | 0.878545 | 0.05 |
| HLA-A*68:01 | 1 | 1173 | 1181 | 9  | NASVVNIQK  | 0.876119 | 0.11 |
| HLA-A*02:01 | 1 | 1000 | 1008 | 9  | RLQSLQTYV  | 0.87376  | 0.05 |
| HLA-A*26:01 | 1 | 192  | 200  | 9  | FVFKNIDGY  | 0.869689 | 0.03 |
| HLA-A*68:02 | 1 | 780  | 788  | 9  | EVFAQVKQI  | 0.865844 | 0.03 |
| HLA-A*02:01 | 1 | 417  | 425  | 9  | KIADYNYKL  | 0.864611 | 0.05 |
| HLA-A*03:01 | 1 | 41   | 49   | 9  | KVFRSSVLH  | 0.859868 | 0.05 |
| HLA-B*35:01 | 1 | 24   | 32   | 9  | LPPAYTNSF  | 0.85814  | 0.06 |
| HLA-A*68:01 | 1 | 349  | 357  | 9  | SVYAWNRKR  | 0.857726 | 0.14 |
| HLA-B*57:01 | 1 | 624  | 633  | 10 | IHADQLTPTW | 0.853487 | 0.16 |
| HLA-B*51:01 | 1 | 1052 | 1060 | 9  | FPQSAPHGV  | 0.853165 | 0.02 |

|             |   |      |      |    |                     |      |
|-------------|---|------|------|----|---------------------|------|
| HLA-A*23:01 | 1 | 788  | 797  | 10 | IYKTPPIKDF0.852007  | 0.03 |
| HLA-A*24:02 | 1 | 1137 | 1145 | 9  | VYDPLQPEL 0.851829  | 0.04 |
| HLA-B*15:01 | 1 | 634  | 643  | 10 | RVYSTGSNVF0.851186  | 0.04 |
| HLA-A*02:06 | 1 | 1060 | 1068 | 9  | VVFLHVTVYV 0.850041 | 0.06 |
| HLA-B*40:01 | 1 | 464  | 472  | 9  | FERDISTEI 0.84839   | 0.09 |
| HLA-B*35:01 | 1 | 343  | 351  | 9  | NATRFASVY 0.847454  | 0.06 |
| HLA-A*02:03 | 1 | 1048 | 1056 | 9  | HLMSFPQSA 0.845506  | 0.05 |
| HLA-A*02:03 | 1 | 958  | 966  | 9  | ALNTLVKQL 0.84284   | 0.05 |
| HLA-A*26:01 | 1 | 258  | 266  | 9  | WTAGAAAYY 0.842739  | 0.03 |
| HLA-A*24:02 | 1 | 144  | 152  | 9  | YYHKNNKSW 0.841714  | 0.04 |
| HLA-A*01:01 | 1 | 828  | 837  | 10 | LADAGFIKQY0.840121  | 0.05 |
| HLA-B*53:01 | 1 | 250  | 258  | 9  | TPGDSSSGW 0.834377  | 0.03 |
| HLA-B*40:01 | 1 | 987  | 996  | 10 | VEAEVQIDRL0.832715  | 0.09 |
| HLA-A*68:02 | 1 | 122  | 130  | 9  | NATNVVIKV 0.832699  | 0.04 |
| HLA-B*44:02 | 1 | 989  | 997  | 9  | AEVQIDRLI 0.829103  | 0.04 |
| HLA-B*44:03 | 1 | 339  | 347  | 9  | GEVFNATRF 0.828162  | 0.07 |
| HLA-A*68:01 | 1 | 677  | 685  | 9  | QTNSPRRAR 0.828157  | 0.19 |
| HLA-B*35:01 | 1 | 229  | 238  | 10 | LPIGINITRF0.828081  | 0.07 |
| HLA-A*11:01 | 1 | 975  | 983  | 9  | SVLNDILSR 0.826842  | 0.06 |
| HLA-B*44:03 | 1 | 297  | 306  | 10 | SETKCTLKSF0.825971  | 0.07 |
| HLA-A*02:01 | 1 | 983  | 991  | 9  | RLDKVEAEV 0.825045  | 0.06 |
| HLA-B*08:01 | 1 | 109  | 117  | 9  | TLDSKTQSL 0.824512  | 0.03 |
| HLA-A*68:02 | 1 | 28   | 36   | 9  | YTNSFTRGV 0.823738  | 0.05 |
| HLA-A*23:01 | 1 | 448  | 456  | 9  | NYNLYRLF 0.823695   | 0.04 |
| HLA-A*68:01 | 1 | 1064 | 1073 | 10 | HVTYVPAQEK0.821398  | 0.19 |
| HLA-A*02:06 | 1 | 976  | 984  | 9  | VLNDILSRL 0.821222  | 0.07 |
| HLA-A*11:01 | 1 | 787  | 795  | 9  | QIYKTPPIK 0.818509  | 0.07 |
| HLA-B*15:01 | 1 | 962  | 970  | 9  | LVKQLSSNF 0.818281  | 0.06 |
| HLA-A*11:01 | 1 | 302  | 310  | 9  | TLKSFTVEK 0.816787  | 0.07 |
| HLA-B*58:01 | 1 | 1054 | 1062 | 9  | QSAPHGVVF 0.815153  | 0.11 |
| HLA-A*01:01 | 1 | 258  | 266  | 9  | WTAGAAAYY 0.81389   | 0.06 |
| HLA-A*26:01 | 1 | 361  | 369  | 9  | CVADYSVLY 0.813057  | 0.04 |
| HLA-B*57:01 | 1 | 880  | 888  | 9  | GTITSGWTF 0.811974  | 0.2  |
| HLA-A*31:01 | 1 | 35   | 44   | 10 | GVYYPDKVFR0.811444  | 0.06 |
| HLA-B*53:01 | 1 | 229  | 238  | 10 | LPIGINITRF0.811192  | 0.03 |
| HLA-B*57:01 | 1 | 814  | 823  | 10 | KRSFIEDLLF0.809729  | 0.2  |
| HLA-B*44:03 | 1 | 747  | 756  | 10 | TECSNLLQY0.808921   | 0.08 |
| HLA-B*40:01 | 1 | 1181 | 1189 | 9  | KEIDRLNEV 0.808555  | 0.1  |
| HLA-A*68:01 | 1 | 975  | 983  | 9  | SVLNDILSR 0.808276  | 0.2  |
| HLA-B*57:01 | 1 | 1054 | 1062 | 9  | QSAPHGVVF 0.805824  | 0.2  |
| HLA-A*11:01 | 1 | 724  | 733  | 10 | TEILPVSMTK0.805288  | 0.08 |
| HLA-A*68:01 | 1 | 777  | 786  | 10 | NTQEVFAQVK0.804955  | 0.2  |
| HLA-A*30:02 | 1 | 1264 | 1272 | 9  | VKGVKLHY 0.804058   | 0.02 |
| HLA-A*24:02 | 1 | 489  | 497  | 9  | YFPLQSYGF 0.80393   | 0.06 |

|             |   |      |      |    |              |          |      |
|-------------|---|------|------|----|--------------|----------|------|
| HLA-A*02:03 | 1 | 1060 | 1068 | 9  | VVFLHVTYV    | 0.803816 | 0.05 |
| HLA-A*02:01 | 1 | 821  | 829  | 9  | LLFNKVTLA    | 0.803506 | 0.08 |
| HLA-B*44:02 | 1 | 297  | 306  | 10 | SETKCTLKSF0  | 0.803485 | 0.05 |
| HLA-A*11:01 | 1 | 1099 | 1107 | 9  | GTHWFVTQR    | 0.802118 | 0.08 |
| HLA-A*23:01 | 1 | 368  | 377  | 10 | LYNSASFSTF0  | 0.801794 | 0.05 |
| HLA-B*15:01 | 1 | 687  | 695  | 9  | VASQSIIAY    | 0.798942 | 0.07 |
| HLA-A*30:02 | 1 | 604  | 612  | 9  | TSNQVAVLY    | 0.798698 | 0.02 |
| HLA-A*02:01 | 1 | 1048 | 1056 | 9  | HLMSFPQSA    | 0.798454 | 0.08 |
| HLA-A*23:01 | 1 | 635  | 643  | 9  | VYSTGSNVF    | 0.798231 | 0.05 |
| HLA-B*35:01 | 1 | 56   | 64   | 9  | LPFFSNVTW    | 0.798144 | 0.08 |
| HLA-A*02:06 | 1 | 718  | 726  | 9  | FTISVTTEI    | 0.796069 | 0.08 |
| HLA-B*35:01 | 1 | 699  | 707  | 9  | LGAENSVAY    | 0.795492 | 0.08 |
| HLA-A*68:01 | 1 | 1098 | 1107 | 10 | NGTHWFVTQR0  | 0.794017 | 0.21 |
| HLA-B*15:01 | 1 | 919  | 927  | 9  | NQKLIANQF    | 0.793418 | 0.07 |
| HLA-A*68:01 | 1 | 228  | 237  | 10 | DLPIGINITR0  | 0.793037 | 0.21 |
| HLA-A*01:01 | 1 | 1197 | 1206 | 10 | LIDLQELGKY0  | 0.791918 | 0.07 |
| HLA-A*68:01 | 1 | 69   | 78   | 10 | HVSGTNGTKR0  | 0.791522 | 0.21 |
| HLA-A*23:01 | 1 | 1137 | 1145 | 9  | VYDPLQPEL    | 0.790353 | 0.05 |
| HLA-B*15:01 | 1 | 413  | 421  | 9  | GQTGKIADY    | 0.790258 | 0.08 |
| HLA-A*68:01 | 1 | 568  | 577  | 10 | DIADTTDAVR0  | 0.789394 | 0.21 |
| HLA-A*02:03 | 1 | 1185 | 1193 | 9  | RLNEVAKNL    | 0.788651 | 0.06 |
| HLA-A*11:01 | 1 | 370  | 378  | 9  | NSASFSTFK    | 0.786812 | 0.08 |
| HLA-A*31:01 | 1 | 558  | 567  | 10 | KFLPFQQFGR0  | 0.786339 | 0.07 |
| HLA-A*03:01 | 1 | 1064 | 1073 | 10 | HVTYVPAQEK0  | 0.781911 | 0.1  |
| HLA-B*44:03 | 1 | 1206 | 1214 | 9  | YEQYIKWPW    | 0.781402 | 0.09 |
| HLA-A*11:01 | 1 | 725  | 733  | 9  | EILPVSMTK    | 0.780217 | 0.09 |
| HLA-A*02:03 | 1 | 1000 | 1008 | 9  | RLQSLQTYV    | 0.779805 | 0.06 |
| HLA-A*33:01 | 1 | 36   | 44   | 9  | VYYPDKVFR    | 0.779146 | 0.03 |
| HLA-A*30:01 | 1 | 454  | 462  | 9  | RLFRKSNLK    | 0.774723 | 0.02 |
| HLA-A*30:02 | 1 | 372  | 380  | 9  | ASFSTFKCY    | 0.77457  | 0.03 |
| HLA-A*23:01 | 1 | 144  | 152  | 9  | YYHKNNKSW    | 0.77397  | 0.05 |
| HLA-B*53:01 | 1 | 896  | 904  | 9  | IPFAMQMAY    | 0.771169 | 0.04 |
| HLA-B*44:03 | 1 | 829  | 837  | 9  | ADAGFIKQY    | 0.769592 | 0.1  |
| HLA-A*30:01 | 1 | 302  | 310  | 9  | TLKSFTVEK    | 0.766302 | 0.02 |
| HLA-B*44:03 | 1 | 1016 | 1024 | 9  | AEIRASANL    | 0.764604 | 0.1  |
| HLA-B*15:01 | 1 | 894  | 902  | 9  | LQIPFAMQM    | 0.763797 | 0.09 |
| HLA-A*02:03 | 1 | 1220 | 1228 | 9  | FIAGLIAIV    | 0.76346  | 0.07 |
| HLA-A*03:01 | 1 | 269  | 278  | 10 | YLQPRTFLLK0  | 0.762757 | 0.12 |
| HLA-A*03:01 | 1 | 724  | 733  | 10 | TEILPVSMTK0  | 0.762384 | 0.12 |
| HLA-A*02:03 | 1 | 109  | 117  | 9  | TLDSKTQSL    | 0.758786 | 0.07 |
| HLA-B*40:01 | 1 | 989  | 997  | 9  | AEVQIDRLI    | 0.758249 | 0.13 |
| HLA-A*68:02 | 1 | 1136 | 1145 | 10 | TVYDPLQPEL0  | 0.758137 | 0.06 |
| HLA-B*57:01 | 1 | 1093 | 1102 | 10 | GVFVSNNGTHW0 | 0.757943 | 0.25 |
| HLA-A*31:01 | 1 | 319  | 328  | 10 | RVQPTESIVR0  | 0.756377 | 0.08 |

|             |   |      |      |    |                    |      |
|-------------|---|------|------|----|--------------------|------|
| HLA-B*15:01 | 1 | 698  | 707  | 10 | SLGAENSVAY0.756258 | 0.1  |
| HLA-A*26:01 | 1 | 191  | 200  | 10 | EFVFKNIDGY0.75517  | 0.05 |
| HLA-A*23:01 | 1 | 159  | 168  | 10 | VYSSANNCTF0.754859 | 0.06 |
| HLA-A*24:02 | 1 | 1094 | 1102 | 9  | VFVSNQTHW 0.754597 | 0.07 |
| HLA-B*44:02 | 1 | 1206 | 1214 | 9  | YEQYIKWPW 0.754025 | 0.08 |
| HLA-B*35:01 | 1 | 162  | 170  | 9  | SANNCTFEY 0.753348 | 0.1  |
| HLA-A*68:02 | 1 | 340  | 348  | 9  | EVFNATRFA 0.751835 | 0.07 |
| HLA-A*23:01 | 1 | 1094 | 1102 | 9  | VFVSNQTHW 0.750957 | 0.06 |
| HLA-B*15:01 | 1 | 1054 | 1062 | 9  | QSAPHGVSF 0.749927 | 0.1  |
| HLA-B*58:01 | 1 | 880  | 888  | 9  | GTITSGWTF 0.748029 | 0.15 |
| HLA-A*01:01 | 1 | 603  | 612  | 10 | NTSNQVAVLY0.744843 | 0.08 |
| HLA-A*23:01 | 1 | 507  | 515  | 9  | PYRVVLSF 0.742903  | 0.07 |
| HLA-A*68:01 | 1 | 35   | 44   | 10 | GVYYPDKVFR0.741864 | 0.27 |
| HLA-A*02:01 | 1 | 1060 | 1068 | 9  | VVFLHVTYV 0.74167  | 0.11 |
| HLA-B*08:01 | 1 | 233  | 241  | 9  | INITRFQTL 0.740901 | 0.05 |
| HLA-B*08:01 | 1 | 1262 | 1270 | 9  | EPVLKGVKL 0.740861 | 0.05 |
| HLA-A*11:01 | 1 | 939  | 947  | 9  | SSTASALGK 0.738311 | 0.11 |
| HLA-B*35:01 | 1 | 271  | 279  | 9  | QPRTFLLKY 0.738211 | 0.1  |
| HLA-A*11:01 | 1 | 409  | 417  | 9  | QIAPGQTGK 0.738116 | 0.11 |
| HLA-A*03:01 | 1 | 409  | 417  | 9  | QIAPGQTGK 0.735412 | 0.14 |
| HLA-B*51:01 | 1 | 122  | 130  | 9  | NATNVVIKV 0.734906 | 0.06 |
| HLA-A*68:01 | 1 | 1005 | 1014 | 10 | QTYVTQQLIR0.734679 | 0.27 |
| HLA-B*58:01 | 1 | 344  | 353  | 10 | ATRFASVYAW0.733299 | 0.16 |
| HLA-A*30:01 | 1 | 344  | 352  | 9  | ATRFASVYA 0.731415 | 0.04 |
| HLA-A*02:06 | 1 | 109  | 117  | 9  | TLDSKTQSL 0.730577 | 0.1  |
| HLA-B*44:02 | 1 | 829  | 837  | 9  | ADAGFIKQY 0.727507 | 0.09 |
| HLA-A*68:01 | 1 | 675  | 683  | 9  | QTQTNSPRR 0.724704 | 0.28 |
| HLA-A*31:01 | 1 | 182  | 190  | 9  | KQGNFKNLR 0.724634 | 0.11 |
| HLA-B*15:01 | 1 | 628  | 636  | 9  | QLTPTWRVY 0.724015 | 0.12 |
| HLA-B*15:01 | 1 | 240  | 248  | 9  | TLLALHRSY 0.72265  | 0.12 |
| HLA-B*15:01 | 1 | 212  | 220  | 9  | LVRDLPQGF 0.72095  | 0.12 |
| HLA-B*44:02 | 1 | 339  | 347  | 9  | GEVFNATRF 0.720722 | 0.09 |
| HLA-A*68:01 | 1 | 88   | 97   | 10 | DGVYFASTEK0.718688 | 0.3  |
| HLA-B*15:01 | 1 | 686  | 695  | 10 | SVASQSIIAY0.718454 | 0.12 |
| HLA-B*58:01 | 1 | 814  | 823  | 10 | KRSFIEDLLF0.718378 | 0.17 |
| HLA-B*07:02 | 1 | 1261 | 1270 | 10 | SEPVLKGVKL0.718257 | 0.11 |
| HLA-A*68:01 | 1 | 1065 | 1073 | 9  | VTYVPAQEK 0.718109 | 0.3  |
| HLA-A*11:01 | 1 | 408  | 417  | 10 | RQIAPGQTGK0.715172 | 0.13 |
| HLA-A*31:01 | 1 | 975  | 983  | 9  | SVLNDILSR 0.713452 | 0.12 |
| HLA-A*23:01 | 1 | 489  | 497  | 9  | YFPLQSYGF 0.712888 | 0.08 |
| HLA-B*15:01 | 1 | 497  | 505  | 9  | FQPTNGVGY 0.712881 | 0.12 |
| HLA-B*57:01 | 1 | 97   | 106  | 10 | KSNIIRGWIF0.712739 | 0.29 |
| HLA-A*24:02 | 1 | 507  | 515  | 9  | PYRVVLSF 0.711831  | 0.09 |
| HLA-A*26:01 | 1 | 686  | 695  | 10 | SVASQSIIAY0.710856 | 0.06 |

|             |   |      |      |    |                     |      |
|-------------|---|------|------|----|---------------------|------|
| HLA-A*11:01 | 1 | 142  | 150  | 9  | GVYYHKNNK 0.70786   | 0.13 |
| HLA-A*11:01 | 1 | 1064 | 1073 | 10 | HVTYVPAQEK0.706779  | 0.13 |
| HLA-A*02:03 | 1 | 975  | 984  | 10 | SVLNDILSRL0.704355  | 0.1  |
| HLA-A*11:01 | 1 | 550  | 558  | 9  | GVLTESNKK 0.704285  | 0.14 |
| HLA-B*35:01 | 1 | 895  | 904  | 10 | QIPFAMQMAY0.702727  | 0.12 |
| HLA-A*68:01 | 1 | 409  | 417  | 9  | QIAPGQTGK 0.702055  | 0.32 |
| HLA-B*35:01 | 1 | 192  | 200  | 9  | FVFKNIDGY 0.69975   | 0.12 |
| HLA-A*01:01 | 1 | 652  | 660  | 9  | GAEHVNNNSY 0.698791 | 0.1  |
| HLA-B*57:01 | 1 | 1203 | 1212 | 10 | LGKYEQYIKW0.698299  | 0.3  |
| HLA-A*02:06 | 1 | 1220 | 1228 | 9  | FIAGLIAIV 0.697944  | 0.11 |
| HLA-A*26:01 | 1 | 360  | 369  | 10 | NCVADYSVLY0.696726  | 0.06 |
| HLA-A*01:01 | 1 | 440  | 449  | 10 | NLDSKVGNY0.696259   | 0.1  |
| HLA-A*33:01 | 1 | 394  | 403  | 10 | NVYADSFVIR0.695997  | 0.07 |
| HLA-A*68:02 | 1 | 1060 | 1068 | 9  | VVFLHVTYV 0.693503  | 0.08 |
| HLA-A*01:01 | 1 | 161  | 170  | 10 | SSANNCTFEY0.691415  | 0.1  |
| HLA-B*40:01 | 1 | 1256 | 1265 | 10 | FDEDDSEPV0.691166   | 0.16 |
| HLA-A*68:02 | 1 | 568  | 576  | 9  | DIADTTDAV 0.691027  | 0.09 |
| HLA-B*58:01 | 1 | 604  | 612  | 9  | TSNQVAVLY 0.690801  | 0.19 |
| HLA-A*02:06 | 1 | 691  | 699  | 9  | SIIAYTMSL 0.69038   | 0.11 |
| HLA-B*57:01 | 1 | 879  | 888  | 10 | AGTITSGWTF0.689438  | 0.31 |
| HLA-B*35:01 | 1 | 898  | 906  | 9  | FAMQMAYRF 0.68794   | 0.13 |
| HLA-A*23:01 | 1 | 1101 | 1109 | 9  | HWFVTQRNF 0.687107  | 0.09 |
| HLA-A*33:01 | 1 | 349  | 357  | 9  | SVYAWNRKR 0.686387  | 0.08 |
| HLA-A*24:02 | 1 | 169  | 177  | 9  | EYVSQPFLM 0.686017  | 0.11 |
| HLA-A*31:01 | 1 | 637  | 646  | 10 | STGSNVFQTR0.683526  | 0.14 |
| HLA-B*40:01 | 1 | 339  | 347  | 9  | GEVFNATRF 0.682004  | 0.16 |
| HLA-B*07:02 | 1 | 526  | 534  | 9  | GPKKSTNLV 0.678799  | 0.13 |
| HLA-A*03:01 | 1 | 1196 | 1205 | 10 | SLIDLQELGK0.677463  | 0.18 |
| HLA-A*02:06 | 1 | 1136 | 1145 | 10 | TVYDPLQPEL0.677074  | 0.12 |
| HLA-B*44:02 | 1 | 1016 | 1024 | 9  | AEIRASANL 0.676171  | 0.11 |
| HLA-A*02:03 | 1 | 386  | 395  | 10 | KLNDLCFTNV0.67519   | 0.11 |
| HLA-B*51:01 | 1 | 8    | 16   | 9  | LPLVSSQCV 0.673254  | 0.09 |
| HLA-A*31:01 | 1 | 346  | 355  | 10 | RFASVYAWNR0.672968  | 0.15 |
| HLA-B*40:01 | 1 | 1261 | 1270 | 10 | SEPVKGVKLO.670789   | 0.17 |
| HLA-A*11:01 | 1 | 454  | 462  | 9  | RLFRKSNLK 0.67072   | 0.16 |
| HLA-A*03:01 | 1 | 349  | 357  | 9  | SVYAWNRKR 0.668534  | 0.19 |
| HLA-B*58:01 | 1 | 712  | 720  | 9  | IAIPTNFTI 0.668254  | 0.21 |
| HLA-A*33:01 | 1 | 395  | 403  | 9  | VYADSFVIR 0.667693  | 0.08 |
| HLA-B*57:01 | 1 | 49   | 58   | 10 | HSTQDLFLPF0.665216  | 0.34 |
| HLA-A*31:01 | 1 | 395  | 403  | 9  | VYADSFVIR 0.664791  | 0.16 |
| HLA-A*01:01 | 1 | 28   | 37   | 10 | YTNSFTRGVY0.661513  | 0.1  |
| HLA-A*03:01 | 1 | 1020 | 1028 | 9  | ASANLAATK 0.660646  | 0.2  |
| HLA-A*03:01 | 1 | 378  | 386  | 9  | KCYGVSPK 0.660274   | 0.2  |
| HLA-A*33:01 | 1 | 677  | 685  | 9  | QTNSPRRAR 0.659706  | 0.08 |

|             |   |      |      |    |            |          |      |
|-------------|---|------|------|----|------------|----------|------|
| HLA-A*30:01 | 1 | 378  | 386  | 9  | KCYGVSPTK  | 0.659228 | 0.06 |
| HLA-A*68:01 | 1 | 69   | 77   | 9  | HVSGTNGTK  | 0.658881 | 0.36 |
| HLA-A*68:01 | 1 | 400  | 408  | 9  | FVIRGDEV   | 0.658436 | 0.37 |
| HLA-B*57:01 | 1 | 604  | 612  | 9  | TSNQVAVLY  | 0.657685 | 0.34 |
| HLA-A*02:01 | 1 | 958  | 966  | 9  | ALNTLVKQL  | 0.657403 | 0.16 |
| HLA-A*23:01 | 1 | 488  | 497  | 10 | CYFPLQSYGF | 0.656733 | 0.09 |
| HLA-A*24:02 | 1 | 1101 | 1109 | 9  | HWFVTQRNF  | 0.656466 | 0.12 |
| HLA-A*31:01 | 1 | 150  | 158  | 9  | KSWMESEFR  | 0.653923 | 0.17 |
| HLA-B*57:01 | 1 | 304  | 313  | 10 | KSFTVEKGIY | 0.653254 | 0.34 |
| HLA-A*02:01 | 1 | 1185 | 1193 | 9  | RLNEVAKNL  | 0.652653 | 0.16 |
| HLA-A*30:01 | 1 | 1065 | 1073 | 9  | VTYVPAQEK  | 0.651559 | 0.06 |
| HLA-B*51:01 | 1 | 1052 | 1061 | 10 | FPQSAPHGVV | 0.65136  | 0.09 |
| HLA-A*68:01 | 1 | 229  | 237  | 9  | LPIGINITR  | 0.651161 | 0.38 |
| HLA-A*31:01 | 1 | 237  | 246  | 10 | RFQTLALHR  | 0.649947 | 0.18 |
| HLA-B*57:01 | 1 | 249  | 258  | 10 | LTPGDSSSGW | 0.6494   | 0.35 |
| HLA-A*02:03 | 1 | 915  | 923  | 9  | VLYENQKLI  | 0.648983 | 0.12 |
| HLA-B*35:01 | 1 | 56   | 65   | 10 | LPFFSNVTWF | 0.648367 | 0.14 |
| HLA-A*01:01 | 1 | 361  | 369  | 9  | CVADYSVLY  | 0.64603  | 0.11 |
| HLA-A*23:01 | 1 | 1208 | 1217 | 10 | QYIKWPWYIW | 0.645985 | 0.1  |
| HLA-A*24:02 | 1 | 488  | 497  | 10 | CYFPLQSYGF | 0.645963 | 0.13 |
| HLA-A*23:01 | 1 | 169  | 177  | 9  | EYVSQPFLM  | 0.644477 | 0.1  |
| HLA-A*30:02 | 1 | 781  | 789  | 9  | VFAQVKQIY  | 0.644353 | 0.08 |
| HLA-A*03:01 | 1 | 805  | 814  | 10 | ILPDSPKPSK | 0.643677 | 0.21 |
| HLA-A*02:06 | 1 | 1000 | 1008 | 9  | RLQSLQTYV  | 0.64316  | 0.14 |
| HLA-A*01:01 | 1 | 733  | 741  | 9  | KTSVDCTMY  | 0.642966 | 0.12 |
| HLA-B*44:02 | 1 | 747  | 756  | 10 | TECSNLLQY  | 0.642665 | 0.12 |
| HLA-A*02:01 | 1 | 1220 | 1228 | 9  | FIAGLIAIV  | 0.641405 | 0.17 |
| HLA-A*30:02 | 1 | 687  | 695  | 9  | VASQSIIAY  | 0.641131 | 0.08 |
| HLA-B*51:01 | 1 | 574  | 582  | 9  | DAVRDPQTL  | 0.639281 | 0.1  |
| HLA-A*11:01 | 1 | 827  | 835  | 9  | TLADAGFIK  | 0.639216 | 0.18 |
| HLA-A*33:01 | 1 | 265  | 273  | 9  | YYVGYLQPR  | 0.638012 | 0.09 |
| HLA-A*24:02 | 1 | 143  | 152  | 10 | VYYHKNNKSW | 0.637746 | 0.13 |
| HLA-B*08:01 | 1 | 996  | 1004 | 9  | LITGRLQSL  | 0.63729  | 0.08 |
| HLA-A*32:01 | 1 | 417  | 425  | 9  | KIADYNYKL  | 0.634457 | 0.05 |
| HLA-A*24:02 | 1 | 203  | 212  | 10 | IYSKHTPINL | 0.634064 | 0.13 |
| HLA-B*57:01 | 1 | 877  | 886  | 10 | LLAGTITSGW | 0.633888 | 0.36 |
| HLA-B*53:01 | 1 | 83   | 92   | 10 | VLPFNDGVYF | 0.63303  | 0.07 |
| HLA-A*30:01 | 1 | 787  | 795  | 9  | QIYKTPPIK  | 0.631297 | 0.06 |
| HLA-B*57:01 | 1 | 1209 | 1217 | 9  | YIKWPWYIW  | 0.630823 | 0.37 |
| HLA-B*35:01 | 1 | 625  | 633  | 9  | HADQLTPTW  | 0.630203 | 0.15 |
| HLA-A*31:01 | 1 | 264  | 273  | 10 | AYVGYLQPRO | 0.627498 | 0.21 |
| HLA-A*68:01 | 1 | 302  | 310  | 9  | TLKSFTVEK  | 0.623075 | 0.43 |
| HLA-A*30:02 | 1 | 162  | 170  | 9  | SANNCTFEY  | 0.62244  | 0.09 |
| HLA-A*02:01 | 1 | 857  | 865  | 9  | GLTVLPPLL  | 0.622173 | 0.18 |

|             |   |      |      |    |              |          |      |
|-------------|---|------|------|----|--------------|----------|------|
| HLA-B*35:01 | 1 | 478  | 486  | 9  | TPCNGVEGF    | 0.622163 | 0.15 |
| HLA-B*53:01 | 1 | 24   | 32   | 9  | LPPAYTNSF    | 0.62158  | 0.07 |
| HLA-A*30:01 | 1 | 142  | 150  | 9  | GVYYHKNNK    | 0.619445 | 0.07 |
| HLA-B*15:01 | 1 | 35   | 43   | 9  | GVYYPDKVF    | 0.619435 | 0.2  |
| HLA-A*30:02 | 1 | 628  | 636  | 9  | QLTPTWRVY    | 0.619267 | 0.09 |
| HLA-A*02:01 | 1 | 1192 | 1200 | 9  | NLNESLIDL    | 0.618877 | 0.18 |
| HLA-A*02:06 | 1 | 777  | 785  | 9  | NTQEVFAQV    | 0.61807  | 0.15 |
| HLA-B*35:01 | 1 | 604  | 612  | 9  | TSNQVAVLY    | 0.6179   | 0.15 |
| HLA-A*30:02 | 1 | 733  | 741  | 9  | KTSVDCTMY    | 0.617596 | 0.1  |
| HLA-A*31:01 | 1 | 310  | 319  | 10 | KGIYQTSNFR0  | 0.617169 | 0.21 |
| HLA-A*01:01 | 1 | 196  | 204  | 9  | NIDGYFKIY    | 0.616114 | 0.13 |
| HLA-A*02:06 | 1 | 894  | 902  | 9  | LQIPFAMQM    | 0.61392  | 0.15 |
| HLA-A*24:02 | 1 | 1208 | 1217 | 10 | QYIKWPWYIW0  | 0.613352 | 0.14 |
| HLA-B*35:01 | 1 | 83   | 92   | 10 | VLPFNDGVYF0  | 0.613298 | 0.16 |
| HLA-B*53:01 | 1 | 320  | 329  | 10 | VQPTESIVRF0  | 0.612597 | 0.07 |
| HLA-A*68:01 | 1 | 347  | 355  | 9  | FASVYAWNR    | 0.611074 | 0.45 |
| HLA-A*26:01 | 1 | 298  | 306  | 9  | ETKCTLKSF    | 0.610601 | 0.08 |
| HLA-B*51:01 | 1 | 84   | 92   | 9  | LPFNDGVYF    | 0.610415 | 0.12 |
| HLA-B*15:01 | 1 | 47   | 55   | 9  | VLHSTQDLF    | 0.609724 | 0.21 |
| HLA-B*35:01 | 1 | 861  | 869  | 9  | LPPLLTDEM    | 0.608235 | 0.16 |
| HLA-A*24:02 | 1 | 78   | 86   | 9  | RFDNPVLPF    | 0.606479 | 0.14 |
| HLA-B*35:01 | 1 | 487  | 495  | 9  | NCYFPLQSY    | 0.605847 | 0.16 |
| HLA-B*35:01 | 1 | 1054 | 1062 | 9  | QSAPHGVSF    | 0.605672 | 0.16 |
| HLA-B*15:01 | 1 | 192  | 200  | 9  | FVFKNIDGY    | 0.603024 | 0.21 |
| HLA-A*68:01 | 1 | 638  | 646  | 9  | TGSNVFQTR    | 0.603019 | 0.47 |
| HLA-A*02:06 | 1 | 1048 | 1056 | 9  | HLMSFPQSA    | 0.601563 | 0.17 |
| HLA-B*15:01 | 1 | 372  | 380  | 9  | ASFSTFKCY    | 0.599051 | 0.21 |
| HLA-A*01:01 | 1 | 30   | 38   | 9  | NSFTRGVYY    | 0.597285 | 0.14 |
| HLA-A*68:01 | 1 | 94   | 102  | 9  | STEKSNIIR    | 0.596515 | 0.48 |
| HLA-A*02:06 | 1 | 133  | 141  | 9  | FQFCNDPFL    | 0.596191 | 0.17 |
| HLA-A*11:01 | 1 | 349  | 357  | 9  | SVYAWNRKR    | 0.596094 | 0.21 |
| HLA-B*58:01 | 1 | 710  | 718  | 9  | NSIAIPTNF    | 0.59572  | 0.25 |
| HLA-A*23:01 | 1 | 143  | 152  | 10 | VYYHKNNKSW0  | 0.595173 | 0.11 |
| HLA-B*57:01 | 1 | 712  | 720  | 9  | IAIPTNFIT    | 0.593982 | 0.41 |
| HLA-A*11:01 | 1 | 348  | 356  | 9  | ASVYAWNRK    | 0.59342  | 0.21 |
| HLA-B*58:01 | 1 | 1093 | 1102 | 10 | GVFVSNGTHW0  | 0.592182 | 0.26 |
| HLA-B*40:01 | 1 | 1015 | 1024 | 10 | AAEIRASANL0  | 0.591426 | 0.21 |
| HLA-A*03:01 | 1 | 453  | 462  | 10 | YRLFRKSNLK0  | 0.591204 | 0.25 |
| HLA-A*32:01 | 1 | 634  | 643  | 10 | RVYSTGSNVF0  | 0.589889 | 0.06 |
| HLA-A*11:01 | 1 | 529  | 537  | 9  | KSTNLVKNK    | 0.588891 | 0.21 |
| HLA-A*11:01 | 1 | 292  | 300  | 9  | ALDPLSETK    | 0.588815 | 0.21 |
| HLA-A*31:01 | 1 | 311  | 319  | 9  | GIYQTSNFR    | 0.587274 | 0.25 |
| HLA-B*44:03 | 1 | 464  | 473  | 10 | FERDISTEIIY0 | 0.586808 | 0.2  |
| HLA-B*07:02 | 1 | 38   | 47   | 10 | YDPKVFRRSSV0 | 0.586215 | 0.19 |



|             |   |      |      |    |                    |      |
|-------------|---|------|------|----|--------------------|------|
| HLA-A*68:01 | 1 | 311  | 319  | 9  | GIYQTSNFR 0.586097 | 0.5  |
| HLA-B*15:01 | 1 | 1059 | 1067 | 9  | GVVFLHVTY 0.585418 | 0.22 |
| HLA-A*02:06 | 1 | 612  | 620  | 9  | YQDVNCTEV 0.584332 | 0.18 |
| HLA-B*15:01 | 1 | 852  | 861  | 10 | AQKFNGLTVL0.584204 | 0.22 |
| HLA-A*03:01 | 1 | 529  | 537  | 9  | KSTNLVKNK 0.581593 | 0.26 |
| HLA-B*35:01 | 1 | 329  | 338  | 10 | FPNITNLCPF0.581019 | 0.18 |
| HLA-A*68:02 | 1 | 717  | 726  | 10 | NFTISVTTEI0.580993 | 0.14 |
| HLA-A*02:01 | 1 | 691  | 699  | 9  | SIIAYTMSL 0.580032 | 0.21 |
| HLA-A*30:01 | 1 | 786  | 795  | 10 | KQIYKTPPIK0.5792   | 0.09 |
| HLA-A*68:02 | 1 | 1188 | 1197 | 10 | EVAKNLNESL0.579163 | 0.14 |
| HLA-A*31:01 | 1 | 348  | 357  | 10 | ASVYAWNKRK0.578807 | 0.26 |
| HLA-B*57:01 | 1 | 710  | 718  | 9  | NSIAIPTNF 0.578173 | 0.43 |
| HLA-A*31:01 | 1 | 454  | 462  | 9  | RLFRKSNLK 0.576303 | 0.26 |
| HLA-A*02:03 | 1 | 995  | 1004 | 10 | RLITGRLQSL0.576159 | 0.18 |
| HLA-B*58:01 | 1 | 49   | 58   | 10 | HSTQDLFLPF0.575502 | 0.27 |
| HLA-A*30:02 | 1 | 304  | 313  | 10 | KSFTVEKGIY0.574093 | 0.11 |
| HLA-A*11:01 | 1 | 826  | 835  | 10 | VTLADAGFIK0.57408  | 0.23 |
| HLA-B*40:01 | 1 | 1257 | 1265 | 9  | DEDDSEPVL 0.57095  | 0.22 |
| HLA-B*08:01 | 1 | 505  | 513  | 9  | YQPYRVVVL 0.570928 | 0.11 |
| HLA-A*30:02 | 1 | 240  | 248  | 9  | TLLALHRYSY 0.5709  | 0.11 |
| HLA-A*01:01 | 1 | 162  | 170  | 9  | SANNCTFEY 0.570386 | 0.15 |
| HLA-B*57:01 | 1 | 372  | 380  | 9  | ASFSTFKCY 0.567253 | 0.44 |
| HLA-A*11:01 | 1 | 35   | 44   | 10 | GVYYPDKVFR0.566756 | 0.23 |
| HLA-A*03:01 | 1 | 1264 | 1272 | 9  | VLKGVKLHY 0.565504 | 0.27 |
| HLA-A*30:02 | 1 | 865  | 873  | 9  | LTDEMIAQY 0.565227 | 0.12 |
| HLA-A*01:01 | 1 | 865  | 874  | 10 | LTDEMIAQYT0.563645 | 0.16 |
| HLA-A*30:02 | 1 | 30   | 38   | 9  | NSFTRGVYY 0.563454 | 0.12 |
| HLA-B*53:01 | 1 | 898  | 906  | 9  | FAMQMAYRF 0.56343  | 0.1  |
| HLA-A*02:03 | 1 | 417  | 425  | 9  | KIADYNYKL 0.563133 | 0.19 |
| HLA-A*02:01 | 1 | 424  | 433  | 10 | KLPDDFTGCV0.562841 | 0.23 |
| HLA-A*02:06 | 1 | 983  | 991  | 9  | RLDKVEAEV 0.562526 | 0.19 |
| HLA-A*30:02 | 1 | 444  | 453  | 10 | KVGGNYNYLY0.561875 | 0.12 |
| HLA-A*02:06 | 1 | 821  | 829  | 9  | LLFNKVTLA 0.560973 | 0.19 |
| HLA-B*53:01 | 1 | 56   | 65   | 10 | LPPFSNVTWF0.559641 | 0.1  |
| HLA-A*02:03 | 1 | 691  | 699  | 9  | SIIAYTMSL 0.55817  | 0.2  |
| HLA-A*02:03 | 1 | 424  | 433  | 10 | KLPDDFTGCV0.556071 | 0.2  |
| HLA-B*53:01 | 1 | 249  | 258  | 10 | LTPGDSSSGW0.555638 | 0.1  |
| HLA-A*03:01 | 1 | 827  | 835  | 9  | TLADAGFIK 0.555592 | 0.28 |
| HLA-A*30:02 | 1 | 686  | 695  | 10 | SVASQSIIAY0.555378 | 0.13 |
| HLA-B*58:01 | 1 | 898  | 906  | 9  | FAMQMAYRF 0.55535  | 0.28 |
| HLA-A*11:01 | 1 | 803  | 811  | 9  | SQILPDPSK 0.555075 | 0.25 |
| HLA-A*32:01 | 1 | 202  | 210  | 9  | KIYSKHTPI 0.553766 | 0.07 |
| HLA-A*68:01 | 1 | 974  | 983  | 10 | SSVLNDILSR0.553501 | 0.55 |
| HLA-B*07:02 | 1 | 1262 | 1270 | 9  | EPVLKGVKL 0.553414 | 0.21 |

|             |   |      |      |    |                    |      |
|-------------|---|------|------|----|--------------------|------|
| HLA-A*68:01 | 1 | 198  | 206  | 9  | DGYFKIYSK 0.55328  | 0.55 |
| HLA-B*57:01 | 1 | 50   | 59   | 10 | STQDLFLPFF0.552122 | 0.47 |
| HLA-A*32:01 | 1 | 880  | 888  | 9  | GTITSGWTF 0.550974 | 0.08 |
| HLA-A*24:02 | 1 | 268  | 277  | 10 | GYLQPRTFLL0.549374 | 0.17 |
| HLA-B*07:02 | 1 | 208  | 216  | 9  | TPINLVRDL 0.548006 | 0.21 |
| HLA-A*11:01 | 1 | 311  | 319  | 9  | GIYQTSNFR 0.547005 | 0.25 |
| HLA-A*33:01 | 1 | 448  | 457  | 10 | NYNLYRLFR0.545544  | 0.13 |
| HLA-A*33:01 | 1 | 449  | 457  | 9  | YNYLYRLFR 0.544741 | 0.13 |
| HLA-A*23:01 | 1 | 78   | 86   | 9  | RFDNPVLPF 0.544699 | 0.14 |
| HLA-A*30:01 | 1 | 634  | 642  | 9  | RVYSTGSNV 0.543326 | 0.1  |
| HLA-B*35:01 | 1 | 865  | 873  | 9  | LTDEMIAYQ 0.541109 | 0.21 |
| HLA-A*03:01 | 1 | 311  | 319  | 9  | GIYQTSNFR 0.540742 | 0.29 |
| HLA-A*23:01 | 1 | 57   | 65   | 9  | PPFSNVTWF 0.540445 | 0.14 |
| HLA-B*08:01 | 1 | 820  | 828  | 9  | DLLFNKVTL 0.539186 | 0.13 |
| HLA-A*24:02 | 1 | 1094 | 1103 | 10 | VFVSNGTHWF0.537769 | 0.18 |
| HLA-A*31:01 | 1 | 676  | 685  | 10 | TQTNSPRRAR0.536946 | 0.31 |
| HLA-A*33:01 | 1 | 228  | 237  | 10 | DLPIGINITR0.536875 | 0.14 |
| HLA-A*31:01 | 1 | 991  | 1000 | 10 | VQIDRLITGR0.536572 | 0.31 |
| HLA-A*02:01 | 1 | 386  | 395  | 10 | KLNDLCFTNV0.533416 | 0.24 |
| HLA-A*02:06 | 1 | 424  | 433  | 10 | KLPDDFTGCV0.532999 | 0.21 |
| HLA-B*35:01 | 1 | 361  | 369  | 9  | CVADYSVLY 0.532646 | 0.22 |
| HLA-B*35:01 | 1 | 30   | 38   | 9  | NSFTRGVYY 0.532345 | 0.22 |
| HLA-B*15:01 | 1 | 689  | 697  | 9  | SQSIIAYTM 0.532235 | 0.26 |
| HLA-B*53:01 | 1 | 878  | 886  | 9  | LAGTITSGW 0.532125 | 0.12 |
| HLA-B*51:01 | 1 | 923  | 931  | 9  | IANQFNSAI 0.531818 | 0.16 |
| HLA-A*03:01 | 1 | 725  | 733  | 9  | EILPVSMTK 0.531629 | 0.3  |
| HLA-B*58:01 | 1 | 249  | 258  | 10 | LTPGDSSSGW0.530312 | 0.3  |
| HLA-A*30:02 | 1 | 361  | 369  | 9  | CVADYSVLY 0.53021  | 0.15 |
| HLA-A*03:01 | 1 | 924  | 933  | 10 | ANQFNSAIGK0.530033 | 0.3  |
| HLA-B*35:01 | 1 | 686  | 695  | 10 | SVASQSIIAY0.529484 | 0.22 |
| HLA-B*15:01 | 1 | 1113 | 1121 | 9  | QIITDNTF 0.529365  | 0.26 |
| HLA-B*53:01 | 1 | 1139 | 1148 | 10 | DPLQPELDSF0.526614 | 0.12 |
| HLA-A*01:01 | 1 | 1039 | 1047 | 9  | RVDFCGKGY 0.526344 | 0.18 |
| HLA-B*51:01 | 1 | 24   | 32   | 9  | LPPAYTNSF 0.52533  | 0.17 |
| HLA-A*24:02 | 1 | 268  | 276  | 9  | GYLQPRTF 0.523018  | 0.18 |
| HLA-A*30:02 | 1 | 28   | 37   | 10 | YTNSFTRGVY0.522409 | 0.16 |
| HLA-A*03:01 | 1 | 292  | 300  | 9  | ALDPLSETK 0.52164  | 0.31 |
| HLA-A*68:01 | 1 | 676  | 685  | 10 | TQTNSPRRAR0.521378 | 0.61 |
| HLA-B*15:01 | 1 | 320  | 329  | 10 | VQPTESIVRF0.520314 | 0.27 |
| HLA-B*57:01 | 1 | 239  | 248  | 10 | QTLALHRSY0.517764  | 0.52 |
| HLA-A*24:02 | 1 | 312  | 320  | 9  | IYQTSNFRV 0.517604 | 0.18 |
| HLA-A*31:01 | 1 | 638  | 646  | 9  | TGSNVFQTR 0.517116 | 0.34 |
| HLA-A*03:01 | 1 | 310  | 319  | 10 | KGIYQTSNFR0.516391 | 0.32 |
| HLA-A*24:02 | 1 | 634  | 643  | 10 | RVYSTGSNVF0.516328 | 0.18 |

|             |   |      |      |    |                    |          |      |
|-------------|---|------|------|----|--------------------|----------|------|
| HLA-A*32:01 | 1 | 344  | 353  | 10 | ATRFASVYAW0.515027 | 0.1      |      |
| HLA-A*32:01 | 1 | 50   | 58   | 9  | STQDLFLPF          | 0.51427  | 0.1  |
| HLA-A*02:01 | 1 | 515  | 524  | 10 | FELLHAPATV0.513156 | 0.26     |      |
| HLA-A*32:01 | 1 | 1185 | 1193 | 9  | RLNEVAKNL          | 0.513013 | 0.1  |
| HLA-A*68:02 | 1 | 704  | 712  | 9  | SVAYSNNSI          | 0.512883 | 0.18 |
| HLA-A*23:01 | 1 | 268  | 277  | 10 | GYLQPRTFLL0.512651 | 0.15     |      |
| HLA-A*02:06 | 1 | 721  | 729  | 9  | SVTTEILPV          | 0.511187 | 0.24 |
| HLA-A*30:02 | 1 | 1147 | 1155 | 9  | SFKEELDKY          | 0.508894 | 0.16 |
| HLA-A*11:01 | 1 | 956  | 964  | 9  | AQALNTLVK          | 0.508732 | 0.29 |
| HLA-B*15:01 | 1 | 270  | 279  | 10 | LQPRTFLKY0.508417  | 0.29     |      |
| HLA-A*02:06 | 1 | 786  | 794  | 9  | KQIYKTPPI          | 0.50734  | 0.25 |
| HLA-A*23:01 | 1 | 1094 | 1103 | 10 | VFVSNGTHWF0.506266 | 0.16     |      |
| HLA-B*15:01 | 1 | 1200 | 1209 | 10 | LQELGKYEQY0.505374 | 0.29     |      |
| HLA-B*08:01 | 1 | 241  | 249  | 9  | LLALHRSYL          | 0.50463  | 0.15 |
| HLA-A*11:01 | 1 | 1196 | 1205 | 10 | SLIDLQELGK0.503672 | 0.29     |      |
| HLA-A*68:02 | 1 | 1220 | 1228 | 9  | FIAGLIAIV          | 0.501049 | 0.19 |
| HLA-A*02:03 | 1 | 634  | 642  | 9  | RVYSTGSNV          | 0.500517 | 0.24 |
| HLA-B*57:01 | 1 | 56   | 64   | 9  | LPPFSNVTW          | 0.498723 | 0.54 |
| HLA-A*68:01 | 1 | 1020 | 1028 | 9  | ASANLAATK          | 0.498553 | 0.65 |
| HLA-A*68:01 | 1 | 89   | 97   | 9  | GVYFASTEK          | 0.497011 | 0.65 |
| HLA-B*07:02 | 1 | 1052 | 1060 | 9  | FPQSAPHGV          | 0.496693 | 0.25 |
| HLA-A*30:01 | 1 | 529  | 537  | 9  | KSTNLVKNK          | 0.495913 | 0.14 |
| HLA-A*02:01 | 1 | 915  | 923  | 9  | VLYENQKLI          | 0.495902 | 0.26 |
| HLA-B*51:01 | 1 | 321  | 329  | 9  | QPTESIVRF          | 0.495863 | 0.19 |
| HLA-A*30:01 | 1 | 202  | 210  | 9  | KIYSKHTPI          | 0.495841 | 0.14 |
| HLA-A*33:01 | 1 | 347  | 355  | 9  | FASVYAWNR          | 0.494019 | 0.16 |
| HLA-B*57:01 | 1 | 898  | 906  | 9  | FAMQMAYRF          | 0.49374  | 0.54 |
| HLA-B*58:01 | 1 | 56   | 64   | 9  | LPPFSNVTW          | 0.49366  | 0.33 |
| HLA-A*31:01 | 1 | 457  | 466  | 10 | RKSNLKPFER0.493077 | 0.37     |      |
| HLA-A*26:01 | 1 | 30   | 38   | 9  | NSFTRGVYY          | 0.492899 | 0.12 |
| HLA-A*11:01 | 1 | 41   | 49   | 9  | KVFRSSVLH          | 0.492404 | 0.3  |
| HLA-A*31:01 | 1 | 302  | 310  | 9  | TLKSFTVEK          | 0.491043 | 0.38 |
| HLA-A*30:02 | 1 | 258  | 266  | 9  | WTAGAAAYY          | 0.490828 | 0.18 |
| HLA-A*68:02 | 1 | 62   | 70   | 9  | VTWFHAIHV          | 0.489747 | 0.2  |
| HLA-B*58:01 | 1 | 687  | 695  | 9  | VASQSIIAY          | 0.489747 | 0.33 |
| HLA-B*51:01 | 1 | 56   | 64   | 9  | LPPFSNVTW          | 0.488507 | 0.2  |
| HLA-A*23:01 | 1 | 268  | 276  | 9  | GYLQPRTFL          | 0.487874 | 0.17 |
| HLA-A*24:02 | 1 | 1211 | 1220 | 10 | KWPWYIWLGF0.48691  | 0.2      |      |
| HLA-A*03:01 | 1 | 1099 | 1107 | 9  | GTHWFVTQR          | 0.486307 | 0.36 |
| HLA-A*23:01 | 1 | 1211 | 1220 | 10 | KWPWYIWLGF0.48608  | 0.17     |      |
| HLA-A*68:02 | 1 | 940  | 948  | 9  | STASALGKL          | 0.485571 | 0.21 |
| HLA-A*01:01 | 1 | 651  | 660  | 10 | IGAHEVNNSY0.485311 | 0.2      |      |
| HLA-A*30:02 | 1 | 357  | 365  | 9  | RISNCVADY          | 0.484483 | 0.18 |
| HLA-A*26:01 | 1 | 583  | 592  | 10 | EILDITPCSF0.484378 | 0.12     |      |

|             |   |      |      |    |                     |      |
|-------------|---|------|------|----|---------------------|------|
| HLA-A*68:01 | 1 | 724  | 733  | 10 | TEILPVSMTK0.483356  | 0.67 |
| HLA-A*30:02 | 1 | 666  | 674  | 9  | IGAGICASY 0.482045  | 0.18 |
| HLA-A*68:02 | 1 | 603  | 611  | 9  | NTSNQVAVL 0.481301  | 0.21 |
| HLA-A*01:01 | 1 | 1146 | 1155 | 10 | DSFKEELDKY0.481064  | 0.2  |
| HLA-B*15:01 | 1 | 152  | 160  | 9  | WMESEFRVY 0.480932  | 0.32 |
| HLA-B*58:01 | 1 | 879  | 888  | 10 | AGTITSGWTF0.479615  | 0.34 |
| HLA-A*32:01 | 1 | 815  | 823  | 9  | RSFIEDLLF 0.479418  | 0.11 |
| HLA-B*08:01 | 1 | 1137 | 1145 | 9  | VYDPLQPEL 0.479112  | 0.16 |
| HLA-A*03:01 | 1 | 35   | 44   | 10 | GVYYPDKVFR0.477862  | 0.37 |
| HLA-A*68:02 | 1 | 886  | 894  | 9  | WTFGAGAAL 0.477819  | 0.21 |
| HLA-A*26:01 | 1 | 603  | 612  | 10 | NTSNQVAVLY0.476654  | 0.12 |
| HLA-B*57:01 | 1 | 267  | 275  | 9  | VGYLQPRTF 0.476575  | 0.56 |
| HLA-A*68:01 | 1 | 827  | 835  | 9  | TLADAGFIK 0.476129  | 0.69 |
| HLA-A*30:01 | 1 | 41   | 49   | 9  | KVFRSSVLH 0.474763  | 0.16 |
| HLA-B*57:01 | 1 | 50   | 58   | 9  | STQDLFLPF 0.474382  | 0.56 |
| HLA-A*30:01 | 1 | 408  | 417  | 10 | RQIAPGQTGK0.473041  | 0.16 |
| HLA-B*07:02 | 1 | 321  | 329  | 9  | QPTESIVRF 0.472976  | 0.27 |
| HLA-B*07:02 | 1 | 714  | 722  | 9  | IPTNFTISV 0.472945  | 0.27 |
| HLA-A*24:02 | 1 | 193  | 201  | 9  | VFKNIDGYF 0.472749  | 0.21 |
| HLA-B*58:01 | 1 | 160  | 168  | 9  | YSSANNCTF 0.472573  | 0.34 |
| HLA-A*11:01 | 1 | 757  | 765  | 9  | GSFCTQLNR 0.472002  | 0.33 |
| HLA-A*30:01 | 1 | 1020 | 1028 | 9  | ASANLAATK 0.471795  | 0.16 |
| HLA-A*03:01 | 1 | 1019 | 1028 | 10 | RASANLAATK0.471098  | 0.38 |
| HLA-B*15:01 | 1 | 366  | 374  | 9  | SVLYNSASF 0.470989  | 0.33 |
| HLA-A*30:02 | 1 | 1039 | 1047 | 9  | RVDFCGKGY 0.470607  | 0.2  |
| HLA-B*51:01 | 1 | 111  | 119  | 9  | DSKTQSLLI 0.470018  | 0.22 |
| HLA-A*11:01 | 1 | 369  | 378  | 10 | YNSASFSTFK0.469471  | 0.33 |
| HLA-B*58:01 | 1 | 865  | 873  | 9  | LTDEMIAYQ 0.467999  | 0.35 |
| HLA-A*11:01 | 1 | 1019 | 1028 | 10 | RASANLAATK0.466715  | 0.33 |
| HLA-A*68:01 | 1 | 369  | 378  | 10 | YNSASFSTFK0.465002  | 0.71 |
| HLA-A*68:01 | 1 | 1031 | 1039 | 9  | ECVLGQSKR 0.464311  | 0.71 |
| HLA-A*03:01 | 1 | 454  | 463  | 10 | RLFRKSNLKP0.463635  | 0.4  |
| HLA-A*30:02 | 1 | 161  | 170  | 10 | SSANNCTFEY0.463277  | 0.2  |
| HLA-A*30:01 | 1 | 19   | 27   | 9  | TTRTQLPPA 0.46289   | 0.17 |
| HLA-B*35:01 | 1 | 1139 | 1148 | 10 | DPLQPELDSF0.462749  | 0.25 |
| HLA-B*15:01 | 1 | 852  | 860  | 9  | AQKFNGLTV 0.462676  | 0.35 |
| HLA-B*35:01 | 1 | 892  | 900  | 9  | AALQIPFAM 0.462137  | 0.25 |
| HLA-A*24:02 | 1 | 57   | 65   | 9  | PFFSNVTWF 0.462093  | 0.22 |
| HLA-B*07:02 | 1 | 24   | 32   | 9  | LPPAYTNSF 0.461961  | 0.28 |
| HLA-A*02:03 | 1 | 937  | 945  | 9  | SLSSTASAL 0.461783  | 0.28 |
| HLA-A*30:01 | 1 | 89   | 97   | 9  | GVYFASTEK 0.460956  | 0.17 |
| HLA-A*03:01 | 1 | 939  | 947  | 9  | SSTASALGK 0.460777  | 0.4  |
| HLA-B*15:01 | 1 | 464  | 473  | 10 | FERDISTEIIY0.460469 | 0.35 |
| HLA-A*23:01 | 1 | 193  | 201  | 9  | VFKNIDGYF 0.460029  | 0.19 |

|             |   |      |      |    |             |          |      |
|-------------|---|------|------|----|-------------|----------|------|
| HLA-B*15:01 | 1 | 604  | 612  | 9  | TSNQVAVLY   | 0.459562 | 0.35 |
| HLA-A*11:01 | 1 | 924  | 933  | 10 | ANQFNSAIGK  | 0.459415 | 0.35 |
| HLA-A*24:02 | 1 | 23   | 32   | 10 | QLPPAYTNSF  | 0.458879 | 0.22 |
| HLA-A*31:01 | 1 | 449  | 457  | 9  | YNYLYRLFR   | 0.456877 | 0.43 |
| HLA-B*15:01 | 1 | 361  | 369  | 9  | CVADYSVLY   | 0.456493 | 0.36 |
| HLA-A*02:03 | 1 | 1047 | 1056 | 10 | YHLMSFPQSA  | 0.456118 | 0.28 |
| HLA-B*53:01 | 1 | 329  | 338  | 10 | FPNITNLCPF  | 0.454515 | 0.16 |
| HLA-A*30:02 | 1 | 413  | 421  | 9  | GQTGKIADY   | 0.454215 | 0.21 |
| HLA-B*35:01 | 1 | 714  | 722  | 9  | IPTNFTISV   | 0.453722 | 0.27 |
| HLA-A*03:01 | 1 | 550  | 558  | 9  | GVLTESNKK   | 0.452652 | 0.4  |
| HLA-A*02:03 | 1 | 947  | 956  | 10 | KLQDVVNQNA  | 0.452435 | 0.28 |
| HLA-B*40:01 | 1 | 1194 | 1203 | 10 | NESLIDLQEL  | 0.4524   | 0.31 |
| HLA-B*53:01 | 1 | 478  | 486  | 9  | TPCNGVEGF   | 0.45206  | 0.16 |
| HLA-A*31:01 | 1 | 13   | 21   | 9  | SQCVNLTR    | 0.451954 | 0.43 |
| HLA-B*07:02 | 1 | 506  | 515  | 10 | QPYRVVLSF   | 0.451783 | 0.29 |
| HLA-A*68:02 | 1 | 907  | 915  | 9  | NGIGVTQNV   | 0.44936  | 0.23 |
| HLA-A*30:02 | 1 | 195  | 204  | 10 | KNIDGYFKIY  | 0.445822 | 0.22 |
| HLA-A*02:03 | 1 | 1136 | 1145 | 10 | TVYDPLQPEL  | 0.444648 | 0.29 |
| HLA-B*08:01 | 1 | 342  | 350  | 9  | FNATRFASV   | 0.44423  | 0.2  |
| HLA-A*68:02 | 1 | 718  | 727  | 10 | FTISVTTEIL  | 0.443734 | 0.24 |
| HLA-A*26:01 | 1 | 604  | 612  | 9  | TSNQVAVLY   | 0.442541 | 0.14 |
| HLA-B*51:01 | 1 | 38   | 47   | 10 | YDPKVFRSSV  | 0.4399   | 0.25 |
| HLA-A*02:03 | 1 | 202  | 210  | 9  | KIYSKHTPI   | 0.439809 | 0.29 |
| HLA-A*31:01 | 1 | 265  | 273  | 9  | YYVGYLQPR   | 0.439463 | 0.45 |
| HLA-A*33:01 | 1 | 1006 | 1014 | 9  | TYVTQQLIR   | 0.439206 | 0.22 |
| HLA-A*02:01 | 1 | 1047 | 1056 | 10 | YHLMSFPQSA  | 0.439192 | 0.32 |
| HLA-A*30:02 | 1 | 496  | 505  | 10 | GFQPTNGVGY  | 0.438863 | 0.23 |
| HLA-A*30:01 | 1 | 235  | 243  | 9  | ITRFQTLA    | 0.438742 | 0.2  |
| HLA-B*44:03 | 1 | 1181 | 1189 | 9  | KEIDRLNEV   | 0.438248 | 0.3  |
| HLA-B*08:01 | 1 | 554  | 562  | 9  | ESNKKFLPF   | 0.438191 | 0.2  |
| HLA-A*01:01 | 1 | 414  | 423  | 10 | QTGKIADYNY  | 0.437978 | 0.24 |
| HLA-A*68:01 | 1 | 258  | 266  | 9  | WTAGAAAYY   | 0.437904 | 0.76 |
| HLA-B*44:02 | 1 | 464  | 473  | 10 | FERDISTEIIY | 0.437515 | 0.24 |
| HLA-B*35:01 | 1 | 1052 | 1060 | 9  | FPQSAPHGV   | 0.437126 | 0.29 |
| HLA-A*30:02 | 1 | 192  | 200  | 9  | FVFKNIDGY   | 0.435517 | 0.23 |
| HLA-A*33:01 | 1 | 1098 | 1107 | 10 | NGTHWFVTQR  | 0.43473  | 0.22 |
| HLA-B*15:01 | 1 | 893  | 902  | 10 | ALQIPFAMQM  | 0.434399 | 0.4  |
| HLA-B*40:01 | 1 | 818  | 826  | 9  | IEDLLFNKV   | 0.433395 | 0.33 |
| HLA-B*58:01 | 1 | 877  | 886  | 10 | LLAGTITSGW  | 0.433085 | 0.38 |
| HLA-A*02:06 | 1 | 424  | 432  | 9  | KLPDFTGC    | 0.432817 | 0.34 |
| HLA-A*26:01 | 1 | 1095 | 1103 | 9  | FVSNGTHWF   | 0.431696 | 0.15 |
| HLA-B*58:01 | 1 | 1094 | 1102 | 9  | VFVSNGTHW   | 0.43061  | 0.38 |
| HLA-B*15:01 | 1 | 880  | 888  | 9  | GTITSGWTF   | 0.430581 | 0.4  |
| HLA-A*30:02 | 1 | 261  | 269  | 9  | GAAAYYVGY   | 0.428567 | 0.24 |

|             |   |      |      |    |                    |      |
|-------------|---|------|------|----|--------------------|------|
| HLA-A*30:02 | 1 | 487  | 495  | 9  | NCYFPLQSY 0.428278 | 0.24 |
| HLA-A*23:01 | 1 | 203  | 212  | 10 | IYSKHTPINL0.427799 | 0.2  |
| HLA-B*57:01 | 1 | 1086 | 1095 | 10 | KAHFPREGVF0.426537 | 0.65 |
| HLA-A*01:01 | 1 | 687  | 695  | 9  | VASQSIIAY 0.42647  | 0.25 |
| HLA-A*02:06 | 1 | 783  | 791  | 9  | AQVKQIYKT 0.426345 | 0.35 |
| HLA-A*03:01 | 1 | 975  | 983  | 9  | SVLNDILSR 0.424744 | 0.44 |
| HLA-A*24:02 | 1 | 379  | 387  | 9  | CYGVSPTKL 0.424143 | 0.24 |
| HLA-A*68:01 | 1 | 782  | 790  | 9  | FAQVKQIYK 0.423831 | 0.79 |
| HLA-B*57:01 | 1 | 1094 | 1102 | 9  | VFVSNGTHW 0.423598 | 0.66 |
| HLA-B*44:02 | 1 | 1181 | 1189 | 9  | KEIDRLNEV 0.423281 | 0.25 |
| HLA-A*02:06 | 1 | 62   | 70   | 9  | VTWFHAIHV 0.422331 | 0.35 |
| HLA-A*33:01 | 1 | 1099 | 1107 | 9  | GTHWFVTQR 0.422018 | 0.25 |
| HLA-A*02:06 | 1 | 634  | 642  | 9  | RVYSTGSNV 0.420746 | 0.35 |
| HLA-A*11:01 | 1 | 925  | 933  | 9  | NQFNSAIGK 0.420485 | 0.39 |
| HLA-B*44:02 | 1 | 553  | 562  | 10 | TESNKKFLPF0.419839 | 0.25 |
| HLA-A*26:01 | 1 | 865  | 873  | 9  | LTDEMIAY 0.419837  | 0.16 |
| HLA-B*57:01 | 1 | 687  | 695  | 9  | VASQSIIAY 0.418371 | 0.66 |
| HLA-A*30:01 | 1 | 845  | 854  | 10 | AARDLICAQK0.418143 | 0.23 |
| HLA-A*02:03 | 1 | 718  | 726  | 9  | FTISVTTEI 0.41683  | 0.32 |
| HLA-A*11:01 | 1 | 974  | 983  | 10 | SSVLNDILSR0.416756 | 0.4  |
| HLA-A*68:01 | 1 | 817  | 825  | 9  | FIEDLLFNK 0.416738 | 0.81 |
| HLA-B*57:01 | 1 | 212  | 220  | 9  | LVRDLPQGF 0.415931 | 0.67 |
| HLA-A*02:03 | 1 | 515  | 524  | 10 | FELLHAPATV0.415603 | 0.32 |
| HLA-A*02:01 | 1 | 975  | 984  | 10 | SVLNDILSRL0.415115 | 0.35 |
| HLA-A*02:06 | 1 | 28   | 36   | 9  | YTNSFTRGV 0.415092 | 0.36 |
| HLA-A*11:01 | 1 | 458  | 466  | 9  | KSNLKPFER 0.414632 | 0.4  |
| HLA-A*02:03 | 1 | 1192 | 1200 | 9  | NLNESLIDL 0.414566 | 0.32 |
| HLA-A*68:01 | 1 | 30   | 38   | 9  | NSFTRGVYY 0.414371 | 0.81 |
| HLA-A*11:01 | 1 | 786  | 795  | 10 | KQIYKTPPIK0.414021 | 0.4  |
| HLA-B*57:01 | 1 | 1005 | 1013 | 9  | QTYVTQQLI 0.413312 | 0.68 |
| HLA-A*02:01 | 1 | 947  | 956  | 10 | KLQDVVNQNA0.413308 | 0.35 |
| HLA-A*02:06 | 1 | 1004 | 1012 | 9  | LQTYVTQQL 0.41247  | 0.36 |
| HLA-B*15:01 | 1 | 699  | 707  | 9  | LGAENSVAY 0.412412 | 0.42 |
| HLA-A*30:02 | 1 | 257  | 266  | 10 | GWTAGAAAYY0.411498 | 0.26 |
| HLA-B*57:01 | 1 | 304  | 312  | 9  | KSFTVEKGI 0.410858 | 0.69 |
| HLA-A*01:01 | 1 | 135  | 144  | 10 | FCNDPFLGVY0.410856 | 0.26 |
| HLA-A*02:06 | 1 | 135  | 143  | 9  | FCNDPFLGV 0.410169 | 0.36 |
| HLA-A*02:01 | 1 | 995  | 1004 | 10 | RLITGRLQSL0.410041 | 0.35 |
| HLA-A*01:01 | 1 | 152  | 160  | 9  | WMESEFRVY 0.410012 | 0.26 |
| HLA-A*02:01 | 1 | 1136 | 1145 | 10 | TVYDPLQPEL0.409155 | 0.35 |
| HLA-A*01:01 | 1 | 136  | 145  | 10 | CNDPFLGVYY0.407233 | 0.26 |
| HLA-A*68:02 | 1 | 495  | 503  | 9  | YGFQPTNGV 0.406838 | 0.27 |
| HLA-A*31:01 | 1 | 757  | 765  | 9  | GSFCTQLNR 0.406627 | 0.52 |
| HLA-A*02:03 | 1 | 241  | 249  | 9  | LLALHRSYL 0.406562 | 0.33 |

|             |   |      |      |    |               |          |      |
|-------------|---|------|------|----|---------------|----------|------|
| HLA-A*24:02 | 1 | 755  | 763  | 9  | QYGSFCTQL     | 0.405495 | 0.26 |
| HLA-B*53:01 | 1 | 624  | 633  | 10 | IHADQLTPTW0.  | 405424   | 0.18 |
| HLA-A*11:01 | 1 | 319  | 328  | 10 | RVQPTESIVR0.  | 403998   | 0.42 |
| HLA-A*02:03 | 1 | 983  | 991  | 9  | RLDKVEAEV     | 0.403746 | 0.34 |
| HLA-A*26:01 | 1 | 780  | 788  | 9  | EVFAQVKQI     | 0.403279 | 0.17 |
| HLA-B*35:01 | 1 | 574  | 582  | 9  | DAVRDPQTL     | 0.403245 | 0.32 |
| HLA-A*68:01 | 1 | 501  | 509  | 9  | NGVGYQPYP     | 0.402687 | 0.84 |
| HLA-A*02:06 | 1 | 975  | 984  | 10 | SVLNDILSRL0.  | 401932   | 0.37 |
| HLA-B*15:01 | 1 | 496  | 505  | 10 | GFQPTNGVGY0.  | 401812   | 0.43 |
| HLA-A*68:02 | 1 | 967  | 976  | 10 | SSNFGAISSV0.  | 40136    | 0.27 |
| HLA-A*33:01 | 1 | 198  | 206  | 9  | DGYFKIYSK     | 0.401222 | 0.27 |
| HLA-A*32:01 | 1 | 1209 | 1217 | 9  | YIKWPWYIW     | 0.401025 | 0.16 |
| HLA-A*02:06 | 1 | 943  | 951  | 9  | SALGKLDV      | 0.400622 | 0.38 |
| HLA-A*01:01 | 1 | 732  | 741  | 10 | TKTSVDCTMY0.  | 400359   | 0.27 |
| HLA-A*68:02 | 1 | 1128 | 1137 | 10 | VVIGIVNNTV0.  | 400091   | 0.28 |
| HLA-B*35:01 | 1 | 55   | 64   | 10 | FLPFFSNVTW0.  | 399642   | 0.32 |
| HLA-A*02:03 | 1 | 512  | 520  | 9  | VLSFELLHA     | 0.399    | 0.34 |
| HLA-A*11:01 | 1 | 637  | 646  | 10 | STGSNVFQTR0.  | 398739   | 0.43 |
| HLA-A*01:01 | 1 | 136  | 144  | 9  | CNDPFLGVY     | 0.398499 | 0.27 |
| HLA-B*53:01 | 1 | 687  | 695  | 9  | VASQSIIAY     | 0.398403 | 0.19 |
| HLA-A*02:06 | 1 | 626  | 635  | 10 | ADQLTPTWRV0.  | 398089   | 0.38 |
| HLA-A*33:01 | 1 | 638  | 646  | 9  | TGSNVFQTR     | 0.397693 | 0.27 |
| HLA-A*30:02 | 1 | 29   | 38   | 10 | TNSFTRGVYY0.  | 396487   | 0.27 |
| HLA-A*02:06 | 1 | 505  | 513  | 9  | YQPYRVVVL     | 0.394518 | 0.39 |
| HLA-A*68:02 | 1 | 691  | 699  | 9  | SIIAYTMSL     | 0.393935 | 0.28 |
| HLA-A*02:06 | 1 | 1007 | 1015 | 9  | YVTQQLIRA     | 0.393796 | 0.39 |
| HLA-A*02:06 | 1 | 852  | 861  | 10 | AQKFNGLTVL0.  | 391583   | 0.4  |
| HLA-A*26:01 | 1 | 28   | 37   | 10 | YTNSFTRGVY0.  | 391325   | 0.18 |
| HLA-A*24:02 | 1 | 267  | 276  | 10 | VGYLQPRTFL0.  | 390779   | 0.26 |
| HLA-B*44:03 | 1 | 553  | 562  | 10 | TESNKKFLPF0.  | 389745   | 0.33 |
| HLA-A*02:06 | 1 | 1181 | 1189 | 9  | KEIDRLNEV     | 0.389617 | 0.4  |
| HLA-B*57:01 | 1 | 865  | 873  | 9  | LTDEMIAQY     | 0.387676 | 0.71 |
| HLA-B*15:01 | 1 | 83   | 92   | 10 | VLPFNDGVVYF0. | 387438   | 0.44 |
| HLA-B*35:01 | 1 | 1021 | 1029 | 9  | SANLAATKM     | 0.386751 | 0.33 |
| HLA-A*03:01 | 1 | 956  | 964  | 9  | AQALNTLVK     | 0.385754 | 0.51 |
| HLA-A*11:01 | 1 | 782  | 790  | 9  | FAQVKQIYK     | 0.38485  | 0.44 |
| HLA-B*35:01 | 1 | 160  | 168  | 9  | YSSANNCTF     | 0.384582 | 0.33 |
| HLA-A*30:02 | 1 | 445  | 453  | 9  | VGGNYNYLY     | 0.384149 | 0.28 |
| HLA-B*15:01 | 1 | 961  | 970  | 10 | TLVKQLSSNF0.  | 383968   | 0.45 |
| HLA-B*57:01 | 1 | 733  | 741  | 9  | KTSVDCTMY     | 0.38378  | 0.72 |
| HLA-A*30:02 | 1 | 1059 | 1067 | 9  | GVVFLHVTY     | 0.383729 | 0.29 |
| HLA-A*31:01 | 1 | 394  | 403  | 10 | NVYADSFVIR0.  | 383163   | 0.57 |
| HLA-B*51:01 | 1 | 727  | 736  | 10 | LPVSMTKTSV0.  | 382919   | 0.32 |
| HLA-B*07:02 | 1 | 620  | 629  | 10 | VPVAIHADQL0.  | 382634   | 0.36 |

|             |   |      |      |    |              |          |      |
|-------------|---|------|------|----|--------------|----------|------|
| HLA-A*02:03 | 1 | 762  | 770  | 9  | QLNRALTGI    | 0.38188  | 0.36 |
| HLA-A*02:01 | 1 | 612  | 620  | 9  | YQDVNCTEV    | 0.380963 | 0.4  |
| HLA-B*53:01 | 1 | 1052 | 1060 | 9  | FPQSAPHGV    | 0.380916 | 0.2  |
| HLA-B*15:01 | 1 | 23   | 32   | 10 | QLPPAYTNSF0. | 380664   | 0.45 |
| HLA-B*35:01 | 1 | 748  | 756  | 9  | ECSNLLLQY    | 0.378678 | 0.34 |
| HLA-A*03:01 | 1 | 69   | 77   | 9  | HVSGTNGTK    | 0.378657 | 0.53 |
| HLA-B*58:01 | 1 | 304  | 313  | 10 | KSFTVEKGIY0. | 378169   | 0.43 |
| HLA-A*11:01 | 1 | 805  | 814  | 10 | ILPDPSKPSK0. | 377972   | 0.45 |
| HLA-A*68:01 | 1 | 787  | 795  | 9  | QIYKTPPIK    | 0.377952 | 0.9  |
| HLA-A*26:01 | 1 | 748  | 756  | 9  | ECSNLLLQY    | 0.37784  | 0.19 |
| HLA-A*68:02 | 1 | 258  | 267  | 10 | WTAGAAAYV0.  | 377231   | 0.3  |
| HLA-A*68:02 | 1 | 1175 | 1183 | 9  | SVVNIQKEI    | 0.376375 | 0.3  |
| HLA-B*15:01 | 1 | 1004 | 1012 | 9  | LQTYVTQQL    | 0.376088 | 0.46 |
| HLA-A*02:01 | 1 | 718  | 726  | 9  | FTISVTTEI    | 0.375875 | 0.4  |
| HLA-B*08:01 | 1 | 453  | 461  | 9  | YRLFRKSNL    | 0.375792 | 0.26 |
| HLA-B*53:01 | 1 | 271  | 279  | 9  | QPRTFLLKY    | 0.375619 | 0.21 |
| HLA-A*11:01 | 1 | 301  | 310  | 10 | CTLKSFTVEK0. | 374903   | 0.46 |
| HLA-B*51:01 | 1 | 780  | 788  | 9  | EVFAQVKQI    | 0.374701 | 0.34 |
| HLA-A*68:02 | 1 | 1095 | 1104 | 10 | FVSNGTHWFV0. | 374303   | 0.3  |
| HLA-A*30:02 | 1 | 371  | 380  | 10 | SASFSTFKCY0. | 373767   | 0.31 |
| HLA-A*68:01 | 1 | 780  | 789  | 10 | EVFAQVKQIY0. | 373626   | 0.91 |
| HLA-B*35:01 | 1 | 1095 | 1103 | 9  | FVSNGTHWF    | 0.373487 | 0.34 |
| HLA-B*15:01 | 1 | 1080 | 1089 | 10 | AICHDGKAHF0. | 372469   | 0.47 |
| HLA-B*07:02 | 1 | 1052 | 1061 | 10 | FPQSAPHGVV0. | 372441   | 0.37 |
| HLA-B*44:03 | 1 | 779  | 788  | 10 | QEVFAQVKQI0. | 372218   | 0.34 |
| HLA-B*51:01 | 1 | 1262 | 1270 | 9  | EPVLKGVKL    | 0.372046 | 0.34 |
| HLA-A*68:01 | 1 | 192  | 200  | 9  | FVFKNIDGY    | 0.370407 | 0.91 |
| HLA-B*35:01 | 1 | 481  | 489  | 9  | NGVEGFNCY    | 0.370024 | 0.35 |
| HLA-B*35:01 | 1 | 1113 | 1121 | 9  | QIITDNTF     | 0.369495 | 0.35 |
| HLA-A*02:06 | 1 | 221  | 229  | 9  | SALEPLVDL    | 0.369483 | 0.43 |
| HLA-A*02:01 | 1 | 133  | 141  | 9  | FQFCNDPFL    | 0.369084 | 0.41 |
| HLA-A*01:01 | 1 | 257  | 266  | 10 | GWTAGAAAYY0. | 366825   | 0.29 |
| HLA-A*68:01 | 1 | 674  | 683  | 10 | YQTQTNSPRR0. | 366818   | 0.93 |
| HLA-A*68:02 | 1 | 1260 | 1268 | 9  | DSEPVLKGV    | 0.365221 | 0.32 |
| HLA-A*33:01 | 1 | 229  | 237  | 9  | LPIGINITR    | 0.364545 | 0.32 |
| HLA-A*31:01 | 1 | 1005 | 1014 | 10 | QTYVTQQLIRO. | 362243   | 0.62 |
| HLA-B*51:01 | 1 | 718  | 726  | 9  | FTISVTTEI    | 0.361993 | 0.37 |
| HLA-A*02:03 | 1 | 869  | 877  | 9  | MIAQYTSAL    | 0.360459 | 0.4  |
| HLA-A*31:01 | 1 | 675  | 683  | 9  | QTQTNSPRR    | 0.360326 | 0.62 |
| HLA-A*31:01 | 1 | 673  | 682  | 10 | SYQTQTNSPR0. | 359865   | 0.62 |
| HLA-A*30:02 | 1 | 41   | 49   | 9  | KVFRSSVLH    | 0.359703 | 0.33 |
| HLA-A*03:01 | 1 | 319  | 328  | 10 | RVQPTESIVR0. | 359462   | 0.54 |
| HLA-B*40:01 | 1 | 168  | 177  | 10 | FEYVSPFLM0.  | 359256   | 0.42 |
| HLA-A*68:02 | 1 | 1005 | 1013 | 9  | QTYVTQQLI    | 0.359238 | 0.32 |



|             |   |      |      |    |              |          |      |
|-------------|---|------|------|----|--------------|----------|------|
| HLA-A*31:01 | 1 | 41   | 49   | 9  | KVFRSSVLH    | 0.358944 | 0.62 |
| HLA-B*15:01 | 1 | 773  | 782  | 10 | EQDKNTQEVF0  | 0.358662 | 0.5  |
| HLA-A*68:01 | 1 | 559  | 567  | 9  | FLPFQQFGR    | 0.358274 | 0.96 |
| HLA-B*57:01 | 1 | 126  | 135  | 10 | VVIKVFCEQF0  | 0.357497 | 0.8  |
| HLA-B*58:01 | 1 | 372  | 380  | 9  | ASFSTFKCY    | 0.356723 | 0.46 |
| HLA-A*68:02 | 1 | 516  | 524  | 9  | ELLHAPATV    | 0.356044 | 0.33 |
| HLA-B*57:01 | 1 | 160  | 168  | 9  | YSSANNCTF    | 0.355521 | 0.8  |
| HLA-A*68:01 | 1 | 361  | 369  | 9  | CVADYSVLY    | 0.355209 | 0.96 |
| HLA-A*30:02 | 1 | 151  | 160  | 10 | SWMESEFRVY0  | 0.354502 | 0.33 |
| HLA-A*68:02 | 1 | 1168 | 1177 | 10 | DISGINASVV0  | 0.353851 | 0.33 |
| HLA-B*57:01 | 1 | 55   | 64   | 10 | FLPFFSNVTW0  | 0.353746 | 0.8  |
| HLA-A*01:01 | 1 | 499  | 508  | 10 | PTNGVGYQPY0  | 0.353345 | 0.31 |
| HLA-A*68:01 | 1 | 604  | 612  | 9  | TSNQVAVLY    | 0.352705 | 0.97 |
| HLA-A*30:02 | 1 | 652  | 660  | 9  | GAEHVNNSY    | 0.352551 | 0.34 |
| HLA-A*02:06 | 1 | 871  | 879  | 9  | AQYTSALLA    | 0.351816 | 0.47 |
| HLA-A*02:06 | 1 | 712  | 720  | 9  | IAIPTNFTI    | 0.35167  | 0.47 |
| HLA-A*68:01 | 1 | 992  | 1000 | 9  | QIDRLITGR    | 0.351529 | 0.97 |
| HLA-B*15:01 | 1 | 50   | 58   | 9  | STQDLFLPF    | 0.351445 | 0.51 |
| HLA-A*23:01 | 1 | 312  | 320  | 9  | IYQTSNFRV    | 0.350817 | 0.25 |
| HLA-A*23:01 | 1 | 23   | 32   | 10 | QLPPAYTNSF0  | 0.350772 | 0.25 |
| HLA-A*02:01 | 1 | 512  | 520  | 9  | VLSFELLHA    | 0.350734 | 0.45 |
| HLA-B*58:01 | 1 | 733  | 741  | 9  | KTSVDCTMY    | 0.34981  | 0.47 |
| HLA-A*03:01 | 1 | 370  | 378  | 9  | NSASFSTFK    | 0.348642 | 0.56 |
| HLA-B*51:01 | 1 | 208  | 216  | 9  | TPINLVRDL    | 0.348237 | 0.4  |
| HLA-B*15:01 | 1 | 30   | 38   | 9  | NSFTRGVYY    | 0.347996 | 0.52 |
| HLA-B*35:01 | 1 | 208  | 216  | 9  | TPINLVRDL    | 0.347963 | 0.37 |
| HLA-B*35:01 | 1 | 652  | 660  | 9  | GAEHVNNSY    | 0.347109 | 0.37 |
| HLA-A*26:01 | 1 | 710  | 718  | 9  | NSIAIPTNF    | 0.346315 | 0.21 |
| HLA-A*01:01 | 1 | 360  | 369  | 10 | NCVADYSVLY0  | 0.346028 | 0.31 |
| HLA-A*02:03 | 1 | 28   | 36   | 9  | YTNSFTRGV    | 0.346    | 0.42 |
| HLA-A*32:01 | 1 | 269  | 277  | 9  | YLPRTFLL     | 0.345894 | 0.21 |
| HLA-A*30:01 | 1 | 683  | 691  | 9  | RARSVASQS    | 0.345166 | 0.33 |
| HLA-A*32:01 | 1 | 366  | 374  | 9  | SVLYNSASF    | 0.344581 | 0.21 |
| HLA-B*51:01 | 1 | 955  | 963  | 9  | NAQALNTLV    | 0.344412 | 0.4  |
| HLA-A*26:01 | 1 | 50   | 58   | 9  | STQDLFLPF    | 0.344143 | 0.21 |
| HLA-B*35:01 | 1 | 366  | 374  | 9  | SVLYNSASF    | 0.343642 | 0.38 |
| HLA-A*33:01 | 1 | 637  | 646  | 10 | STGSNVFQTR0  | 0.343407 | 0.35 |
| HLA-A*02:06 | 1 | 1192 | 1200 | 9  | NLNESLIDL    | 0.343239 | 0.48 |
| HLA-A*68:02 | 1 | 869  | 877  | 9  | MIAQYTSAL    | 0.342602 | 0.34 |
| HLA-A*32:01 | 1 | 1054 | 1062 | 9  | QSAPHGVVF    | 0.34191  | 0.21 |
| HLA-A*11:01 | 1 | 686  | 695  | 10 | SVASQSI IAY0 | 0.340989 | 0.52 |
| HLA-B*08:01 | 1 | 533  | 541  | 9  | LVKNKCVNF    | 0.340377 | 0.3  |
| HLA-B*35:01 | 1 | 710  | 718  | 9  | NSIAIPTNF    | 0.339725 | 0.38 |
| HLA-A*30:01 | 1 | 803  | 811  | 9  | SQILPDPSK    | 0.339684 | 0.34 |

|             |   |      |      |    |             |          |      |
|-------------|---|------|------|----|-------------|----------|------|
| HLA-A*68:02 | 1 | 968  | 976  | 9  | SNFGAISSV   | 0.339107 | 0.34 |
| HLA-A*26:01 | 1 | 442  | 451  | 10 | DSKVGGNVNY0 | 0.337749 | 0.21 |
| HLA-A*32:01 | 1 | 691  | 699  | 9  | SIIAYTMSL   | 0.337355 | 0.21 |
| HLA-A*11:01 | 1 | 269  | 278  | 10 | YLPRTFLLK0  | 0.336981 | 0.53 |
| HLA-A*02:06 | 1 | 773  | 781  | 9  | EQDKNTQEV   | 0.33688  | 0.49 |
| HLA-B*53:01 | 1 | 574  | 582  | 9  | DAVRDPQTL   | 0.336628 | 0.25 |
| HLA-A*01:01 | 1 | 748  | 756  | 9  | ECSNLLQY    | 0.336613 | 0.32 |
| HLA-A*02:01 | 1 | 516  | 524  | 9  | ELLHAPATV   | 0.336419 | 0.48 |
| HLA-B*07:02 | 1 | 869  | 877  | 9  | MIAQYTSAL   | 0.33632  | 0.43 |
| HLA-A*68:01 | 1 | 399  | 408  | 10 | SFVIRGDEV0  | 0.33592  | 1.1  |
| HLA-B*15:01 | 1 | 533  | 541  | 9  | LVKNKCVNF   | 0.335721 | 0.55 |
| HLA-A*32:01 | 1 | 509  | 517  | 9  | RVVLSFEL    | 0.335124 | 0.21 |
| HLA-A*02:01 | 1 | 424  | 432  | 9  | KLPDDFTGC   | 0.334903 | 0.48 |
| HLA-A*33:01 | 1 | 450  | 458  | 9  | NYLYRLFRK   | 0.334458 | 0.36 |
| HLA-B*53:01 | 1 | 383  | 392  | 10 | SPTKLNLCF0  | 0.333453 | 0.25 |
| HLA-A*30:02 | 1 | 1101 | 1110 | 10 | HWFVTQRNFY0 | 0.333339 | 0.36 |
| HLA-A*26:01 | 1 | 718  | 726  | 9  | FTISVTTEI   | 0.332779 | 0.21 |
| HLA-A*11:01 | 1 | 549  | 558  | 10 | TGVLTESNKK0 | 0.332729 | 0.54 |
| HLA-A*02:06 | 1 | 958  | 966  | 9  | ALNTLVKQL   | 0.332633 | 0.5  |
| HLA-B*08:01 | 1 | 869  | 877  | 9  | MIAQYTSAL   | 0.33241  | 0.31 |
| HLA-A*68:01 | 1 | 26   | 34   | 9  | PAYTNSFTR   | 0.331881 | 1.1  |
| HLA-B*35:01 | 1 | 258  | 266  | 9  | WTAGAAAYY   | 0.331721 | 0.39 |
| HLA-B*51:01 | 1 | 92   | 100  | 9  | FASTEKSNI   | 0.331413 | 0.42 |
| HLA-B*15:01 | 1 | 864  | 873  | 10 | LLTDEMIAQY0 | 0.330897 | 0.56 |
| HLA-A*02:03 | 1 | 1171 | 1179 | 9  | GINASVVNI   | 0.330579 | 0.45 |
| HLA-A*33:01 | 1 | 35   | 44   | 10 | GVYYPDKVFR0 | 0.330452 | 0.36 |
| HLA-B*58:01 | 1 | 1203 | 1212 | 10 | LGKYEQYIKW0 | 0.33025  | 0.5  |
| HLA-B*08:01 | 1 | 691  | 699  | 9  | SIIAYTMSL   | 0.330189 | 0.31 |
| HLA-A*30:01 | 1 | 575  | 584  | 10 | AVRDPQTLEI0 | 0.330094 | 0.35 |
| HLA-B*15:01 | 1 | 551  | 559  | 9  | VLTESNKKF   | 0.329933 | 0.56 |
| HLA-B*07:02 | 1 | 84   | 92   | 9  | LPFNDGVYF   | 0.329782 | 0.43 |
| HLA-B*57:01 | 1 | 809  | 817  | 9  | PSKPSKRSF   | 0.329605 | 0.86 |
| HLA-B*51:01 | 1 | 229  | 238  | 10 | LPIGINITRF0 | 0.329148 | 0.43 |
| HLA-B*07:02 | 1 | 462  | 470  | 9  | KPFERDIST   | 0.328583 | 0.44 |
| HLA-A*33:01 | 1 | 975  | 983  | 9  | SVLNDILSR   | 0.328563 | 0.37 |
| HLA-B*51:01 | 1 | 896  | 904  | 9  | IPFAMQMAY   | 0.328521 | 0.43 |
| HLA-B*58:01 | 1 | 50   | 58   | 9  | STQDLFLPF   | 0.327613 | 0.52 |
| HLA-A*02:06 | 1 | 1185 | 1193 | 9  | RLNEVAKNL   | 0.327598 | 0.51 |
| HLA-A*68:02 | 1 | 135  | 143  | 9  | FCNDPFLGV   | 0.327522 | 0.38 |
| HLA-A*30:01 | 1 | 1064 | 1073 | 10 | HVTYVPAQEK0 | 0.326791 | 0.37 |
| HLA-B*51:01 | 1 | 425  | 433  | 9  | LPDDFTGCV   | 0.325956 | 0.43 |
| HLA-B*35:01 | 1 | 320  | 329  | 10 | VQPTESIVRF0 | 0.325631 | 0.39 |
| HLA-A*31:01 | 1 | 12   | 21   | 10 | SSQCVNLTTR0 | 0.325231 | 0.71 |
| HLA-B*08:01 | 1 | 202  | 210  | 9  | KIYSKHTPI   | 0.324637 | 0.32 |

|             |   |      |      |    |                    |      |
|-------------|---|------|------|----|--------------------|------|
| HLA-A*30:02 | 1 | 999  | 1007 | 9  | GRLQSLQTY 0.324253 | 0.38 |
| HLA-A*30:02 | 1 | 651  | 660  | 10 | IGAЕHVNNSY0.324128 | 0.38 |
| HLA-B*53:01 | 1 | 714  | 722  | 9  | IPTNFTISV 0.324037 | 0.26 |
| HLA-B*08:01 | 1 | 833  | 841  | 9  | FIKQYGDCL 0.323762 | 0.32 |
| HLA-B*57:01 | 1 | 962  | 970  | 9  | LVKQLSSNF 0.323546 | 0.87 |
| HLA-A*30:02 | 1 | 603  | 612  | 10 | NTSNQVAVLY0.323431 | 0.38 |
| HLA-A*11:01 | 1 | 777  | 786  | 10 | NTQEVFAQVK0.323299 | 0.56 |
| HLA-A*02:06 | 1 | 386  | 395  | 10 | KLNDLCFTNV0.323023 | 0.52 |
| HLA-B*51:01 | 1 | 560  | 569  | 10 | LPFQQFGRDI0.322585 | 0.44 |
| HLA-B*15:01 | 1 | 334  | 342  | 9  | NLCPFGEVF 0.322517 | 0.58 |
| HLA-B*58:01 | 1 | 97   | 106  | 10 | KSNIIRGWIF0.322465 | 0.52 |
| HLA-B*44:03 | 1 | 987  | 996  | 10 | VEAEVQIDRL0.322031 | 0.38 |
| HLA-B*35:01 | 1 | 138  | 146  | 9  | DPFLGVYYH 0.321595 | 0.4  |
| HLA-A*30:01 | 1 | 1019 | 1028 | 10 | RASANLAATK0.321031 | 0.38 |
| HLA-B*07:02 | 1 | 680  | 689  | 10 | SPRRARVAS0.321024  | 0.44 |
| HLA-A*11:01 | 1 | 816  | 825  | 10 | SFIEDLLFNK0.320943 | 0.56 |
| HLA-A*01:01 | 1 | 29   | 38   | 10 | TNSFTRGVYY0.320865 | 0.35 |
| HLA-B*57:01 | 1 | 204  | 212  | 9  | YSKHTPINL 0.320589 | 0.87 |
| HLA-B*07:02 | 1 | 588  | 597  | 10 | TPCSFGGVS0.319415  | 0.45 |
| HLA-B*51:01 | 1 | 324  | 332  | 9  | ESIVRFPNI 0.319087 | 0.44 |
| HLA-B*44:02 | 1 | 779  | 788  | 10 | QEVAQVKQI0.31908   | 0.34 |
| HLA-B*15:01 | 1 | 505  | 513  | 9  | YQPYRVVVL 0.318775 | 0.59 |
| HLA-A*68:01 | 1 | 826  | 835  | 10 | VTLADAGFIK0.317847 | 1.1  |
| HLA-A*30:02 | 1 | 443  | 451  | 9  | SKVGGNYNY 0.31758  | 0.39 |
| HLA-A*30:02 | 1 | 699  | 707  | 9  | LGAENSVAY 0.317344 | 0.39 |
| HLA-A*02:03 | 1 | 516  | 524  | 9  | ELLHAPATV 0.317281 | 0.47 |
| HLA-A*03:01 | 1 | 826  | 835  | 10 | VTLADAGFIK0.317095 | 0.62 |
| HLA-A*68:02 | 1 | 324  | 332  | 9  | ESIVRFPNI 0.316674 | 0.38 |
| HLA-A*02:03 | 1 | 857  | 865  | 9  | GLTVLPPLL 0.316428 | 0.47 |
| HLA-A*26:01 | 1 | 554  | 562  | 9  | ESNKKFLPF 0.315557 | 0.23 |
| HLA-A*26:01 | 1 | 487  | 495  | 9  | NCYFPLQSY 0.315549 | 0.23 |
| HLA-A*02:06 | 1 | 1137 | 1145 | 9  | VYDPLQPEL 0.314486 | 0.54 |
| HLA-A*02:06 | 1 | 995  | 1004 | 10 | RLITGRLQSL0.313029 | 0.54 |
| HLA-A*30:02 | 1 | 909  | 917  | 9  | IGVTQNVLY 0.312847 | 0.41 |
| HLA-A*68:01 | 1 | 1050 | 1058 | 9  | MSFPQSAPH 0.312819 | 1.2  |
| HLA-A*68:01 | 1 | 625  | 634  | 10 | HADQLTPTWR0.312632 | 1.2  |
| HLA-A*68:02 | 1 | 734  | 742  | 9  | TSVDCTMYI 0.312368 | 0.39 |
| HLA-A*26:01 | 1 | 1146 | 1155 | 10 | DSFKEELDKY0.312308 | 0.24 |
| HLA-B*57:01 | 1 | 144  | 152  | 9  | YYHKNNKSW 0.311801 | 0.89 |
| HLA-B*51:01 | 1 | 503  | 511  | 9  | VGYPYRVV 0.311555  | 0.44 |
| HLA-A*30:02 | 1 | 19   | 28   | 10 | TTRTQLPPAY0.311293 | 0.41 |
| HLA-B*15:01 | 1 | 34   | 43   | 10 | RGVYYPDKVF0.310843 | 0.6  |
| HLA-A*23:01 | 1 | 267  | 276  | 10 | VGYLQPRTFLO.310776 | 0.29 |
| HLA-B*35:01 | 1 | 1089 | 1097 | 9  | FPREGVFS 0.310374  | 0.41 |

|             |   |      |      |    |             |          |      |
|-------------|---|------|------|----|-------------|----------|------|
| HLA-A*03:01 | 1 | 925  | 933  | 9  | NQFNSAIGK   | 0.310061 | 0.63 |
| HLA-A*33:01 | 1 | 839  | 847  | 9  | DCLGDIAAR   | 0.309984 | 0.41 |
| HLA-A*32:01 | 1 | 625  | 633  | 9  | HADQLPTW    | 0.309795 | 0.24 |
| HLA-A*03:01 | 1 | 104  | 113  | 10 | WIFGTTLDSK0 | 0.309697 | 0.64 |
| HLA-A*68:01 | 1 | 603  | 612  | 10 | NTSNQVAVLY0 | 0.309036 | 1.2  |
| HLA-A*11:01 | 1 | 378  | 386  | 9  | KCYGVSPK    | 0.307895 | 0.59 |
| HLA-A*24:02 | 1 | 269  | 277  | 9  | YLQPRTFLL   | 0.30782  | 0.33 |
| HLA-A*30:01 | 1 | 1014 | 1022 | 9  | RAAEIRASA   | 0.307578 | 0.41 |
| HLA-B*58:01 | 1 | 1005 | 1013 | 9  | QTYVTQQLI   | 0.307506 | 0.54 |
| HLA-A*11:01 | 1 | 817  | 825  | 9  | FIEDLLFNK   | 0.306918 | 0.59 |
| HLA-B*08:01 | 1 | 40   | 48   | 9  | DKVFRSSVL   | 0.30644  | 0.34 |
| HLA-B*51:01 | 1 | 495  | 503  | 9  | YGFQPTNGV   | 0.306067 | 0.45 |
| HLA-A*26:01 | 1 | 125  | 133  | 9  | NVVIKVCEF   | 0.305959 | 0.24 |
| HLA-B*51:01 | 1 | 1060 | 1068 | 9  | VVFLHVTVV   | 0.305733 | 0.45 |
| HLA-A*03:01 | 1 | 301  | 310  | 10 | CTLKSFTVEK0 | 0.305624 | 0.65 |
| HLA-A*32:01 | 1 | 1264 | 1272 | 9  | VLKGVKLHY   | 0.305119 | 0.25 |
| HLA-A*33:01 | 1 | 673  | 682  | 10 | SYQTQTNSPR0 | 0.304197 | 0.42 |
| HLA-B*15:01 | 1 | 261  | 269  | 9  | GAAAYVGY    | 0.303395 | 0.62 |
| HLA-B*58:01 | 1 | 267  | 275  | 9  | VGYLQPRTF   | 0.303126 | 0.55 |
| HLA-A*30:02 | 1 | 698  | 707  | 10 | SLGAENSVAY0 | 0.302374 | 0.44 |
| HLA-B*53:01 | 1 | 710  | 718  | 9  | NSIAIPTNF   | 0.302006 | 0.28 |
| HLA-B*07:02 | 1 | 727  | 736  | 10 | LPVSMKTSV0  | 0.302005 | 0.47 |
| HLA-A*26:01 | 1 | 687  | 695  | 9  | VASQSIIAY   | 0.301442 | 0.25 |
| HLA-B*35:01 | 1 | 1262 | 1270 | 9  | EPVLKGVKL   | 0.300872 | 0.42 |
| HLA-A*68:01 | 1 | 142  | 150  | 9  | GVYYHKNNK   | 0.300562 | 1.2  |
