# Supplementary material for: A peptide-based subunit candidate vaccine against SARS-CoV-2 delivered by biodegradable mesoporous silica nanoparticles induced high humoral and cellular immunity in mice
Source: Royal Society of Chemistry journal article supplement (doi:10.1039/d1bm01060c), 2021-01-01
Supplement: d1bm01060c5.pdf [file d1bm01060c5.pdf]

Table S1. Set of the screened linear B cell epitopes which also contained CTL epitopes derived from spike protein of SARS-CoV-1.

| No. | B cell epitope sequence                                                 | No.   | IEDB ID | Epitope sequence      | MHC Allele Class | MHC Allele                                                          |
|-----|-------------------------------------------------------------------------|-------|---------|-----------------------|------------------|---------------------------------------------------------------------|
| B1  | DAVDCSQNPLAE<br><u>LKCSVKSFEIDKG</u><br><u>IYQTSN</u>                   | B1-T1 | 15552   | FEIDKGIYQT            | I                | HLA-B*40:01,HLA-B*40:02,<br>HLA-B*45:01                             |
|     |                                                                         | B1-T2 | 33303   | KSFEIDKGIY            | I                | HLA-A*01:01,HLA-A*29:02,<br>HLA-A*30:02                             |
| B3  | <u>PLNDYGFYTTTGI</u><br><u>GY</u>                                       | B3-T  | 18477   | FYTTTGIYGY            | I                | HLA-A*01:01,HLA-A*26:01                                             |
| B4  | <u>GPKLSTDLIK</u><br><u>NQC</u><br><u>VNFNENGLTGTG</u><br><u>VLTPSS</u> | B4-T1 | 21675   | GPKLSTDLIK<br>NQC     | I                | IFN- $\gamma$ release, positive<br>TNF- $\alpha$ release, positive  |
|     |                                                                         | B4-T2 | 26858   | IKNQC<br>VNFNENGLTGTG | I                | IFN- $\gamma$ release, positive<br>TNF- $\alpha$ release, positive  |
| B5  | <u>FSQILPDPLKPTK</u><br>RSFIE                                           | B5-T1 | 27241   | ILPDPLKPT             | I                | HLA-A*02:01<br>IFN- $\gamma$ release, positive                      |
|     |                                                                         | B5-T2 | 60463   | SQILPDPLK             | I                | HLA-A*11:01                                                         |
| B6  | <u>SFIEDLLFNK</u><br><u>VTL</u><br><u>ADAGF</u>                         | B6-T1 | 57792   | SFIEDLLFNK            | I                | HLA-A*11:01,HLA-A*31:01,<br>HLA-A*33:01,HLA-A*68:01,<br>HLA-DR      |
|     |                                                                         | B6-T2 | 37289   | LLFNKVTLA             | I                | HLA-A*02:01,HLA-A*02:02,<br>HLA-A*02:03,HLA-A*02:06,<br>HLA-A*68:02 |

Epitopes that were also tested for positive T cell response (MHC-I) are underlined.
