# Supplementary material for: A peptide-based subunit candidate vaccine against SARS-CoV-2 delivered by biodegradable mesoporous silica nanoparticles induced high humoral and cellular immunity in mice
Source: Royal Society of Chemistry journal article supplement (doi:10.1039/d1bm01060c), 2021-01-01
Supplement: d1bm01060c6.pdf [file d1bm01060c6.pdf]

Table S5. Comparison of the selected T cell epitopes of SARS-CoV-2 S protein mapped to SARS-COV-1 with the predicted epitopes by MHC-I Binding Predictions in IEDB.

| Selected T cell epitopes |            |           |                  | Predicted epitope |           |           |             | Identity (%) |
|--------------------------|------------|-----------|------------------|-------------------|-----------|-----------|-------------|--------------|
| No.                      | Sequence   | Start-End | MHC Allele Class | MHC Allele        | Sequence  | Start-End | MHC Allele  |              |
| T1                       | GYQPYRVVVL | 504-513   | I                | HLA-A*23:01       | YQPYRVVVL | 505-513   | HLA-B*08:01 | 90           |
|                          |            |           |                  | HLA-A*24:02       |           |           | HLA-A*02:06 |              |
|                          |            |           |                  | HLA-A*29:02       |           |           | HLA-B*15:01 |              |
| T2                       | PYRVVLSF   | 507-515   | I                | HLA-A*01:01       | PYRVVLSF  | 507-515   | HLA-A*23:01 | 100          |
|                          |            |           |                  | HLA-A*23:01       |           |           | HLA-A*24:02 |              |
|                          |            |           |                  | HLA-A*24:02       |           |           | HLA-A*24:02 |              |
|                          |            |           |                  | HLA-A*26:01       |           |           |             |              |
| T3                       | RVDFCGKGY  | 1039-1047 | I                | HLA-A*01:01       | RVDFCGKGY | 1039-1047 | HLA-A*01:01 | 100          |
|                          |            |           |                  | HLA-A*03:01       |           |           | HLA-A*30:02 |              |
|                          |            |           |                  | HLA-A*15:01       |           |           | HLA-A*30:02 |              |
|                          |            |           |                  | HLA-A*30:02       |           |           | HLA-A*30:02 |              |
|                          |            |           |                  | HLA-B*27:05       |           |           |             |              |
